# Supplementary material for: The direct amidation of α-diketones with amines via TBHP-promoted oxidative cleavage of C(sp2)–C(sp2) bonds
Source: Royal Society of Chemistry journal article supplement (doi:10.1039/c3ob41392f), 2013-01-01

Supplementary Material (ESI) for Organic & Biomolecular Chemistry  
This journal is (c) The Royal Society of Chemistry 2013

## Supporting Information

### The Direct Amidation of $\alpha$ -Diketones with Amines via TBHP-Promoted Oxidative Cleavage of C(sp<sup>2</sup>)-C(sp<sup>2</sup>) Bond

Qiong Zhao,<sup>[a]</sup> Hongji Li,<sup>[a]</sup> and Lei Wang\*<sup>[a],[b]</sup>

<sup>[a]</sup> Department of Chemistry, Huaibei Normal University, Huaibei, Anhui 235000, P R  
China

Tel: + 86-561-3802-069 Fax: + 86-561-3090-518 E-mail: [leiwang@chnu.edu.cn](mailto:leiwang@chnu.edu.cn)

<sup>[b]</sup> State Key Laboratory of Organometallic Chemistry, Shanghai Institute of Organic  
Chemistry, Chinese Academy of Sciences, Shanghai 200032, P R China

#### *Table of Contents for Supporting Information*

|                                                                                       |   |
|---------------------------------------------------------------------------------------|---|
| 1. General considerations.....                                                        | 2 |
| 2. Typical procedure for the direct amidation of $\alpha$ -diketones with amines..... | 2 |
| 3. <sup>1</sup> H and <sup>13</sup> C NMR spectra of the products.....                | 3 |

## 1. General considerations

All the reactions of acetophenones and formamides were carried out under an air atmosphere.  $^1\text{H}$  NMR and  $^{13}\text{C}$  NMR spectra were measured on a Bruker Avance NMR spectrometer (400 MHz or 100MHz, respectively) with  $\text{CDCl}_3$  as solvent and recorded in ppm relative to internal tetramethylsilane standard. The peak patterns are indicated as follows: s, singlet; d, doublet; t, triplet; m, multiplet; q, quartet. The coupling constants,  $J$ , are reported in Hertz (Hz). High resolution mass spectroscopy data of the product were collected on a Waters Micromass GCT instrument. Solvents and general chemicals were purchased from commercial suppliers and used without further purification.

## 2. Typical procedure for the catalytic oxidative reaction

Under air atmosphere, a sealable reaction tube with a Teflon-coated screw cap equipped with a magnetic stir bar was charged with  $\alpha$ -diketone (benzil, **1a**, 0.50 mmol), piperidine (**2a**, 0.50 mmol), *t*-BuOOH (TBHP, 2.0 mmol), and  $\text{K}_2\text{CO}_3$  (0.50 mmol). The rubber septum was then replaced by a Teflon-coated screw cap, and the reaction vessel placed in an oil bath at 80 °C for 12 h. After the reaction was completed, it was cooled to room temperature and quenched with water and extracted with ethyl acetate. The resulting solution was directly filtered through a pad of silica gel using a sintered glass funnel, and concentrated under reduced pressure. The residue was purified by flash chromatography on silica gel (eluant: petroleum ether/ethyl acetate) to give the desired product phenyl(piperidin-1-yl)methanone (**3a**).

### 3. $^1\text{H}$ and $^{13}\text{C}$ NMR spectra of the products

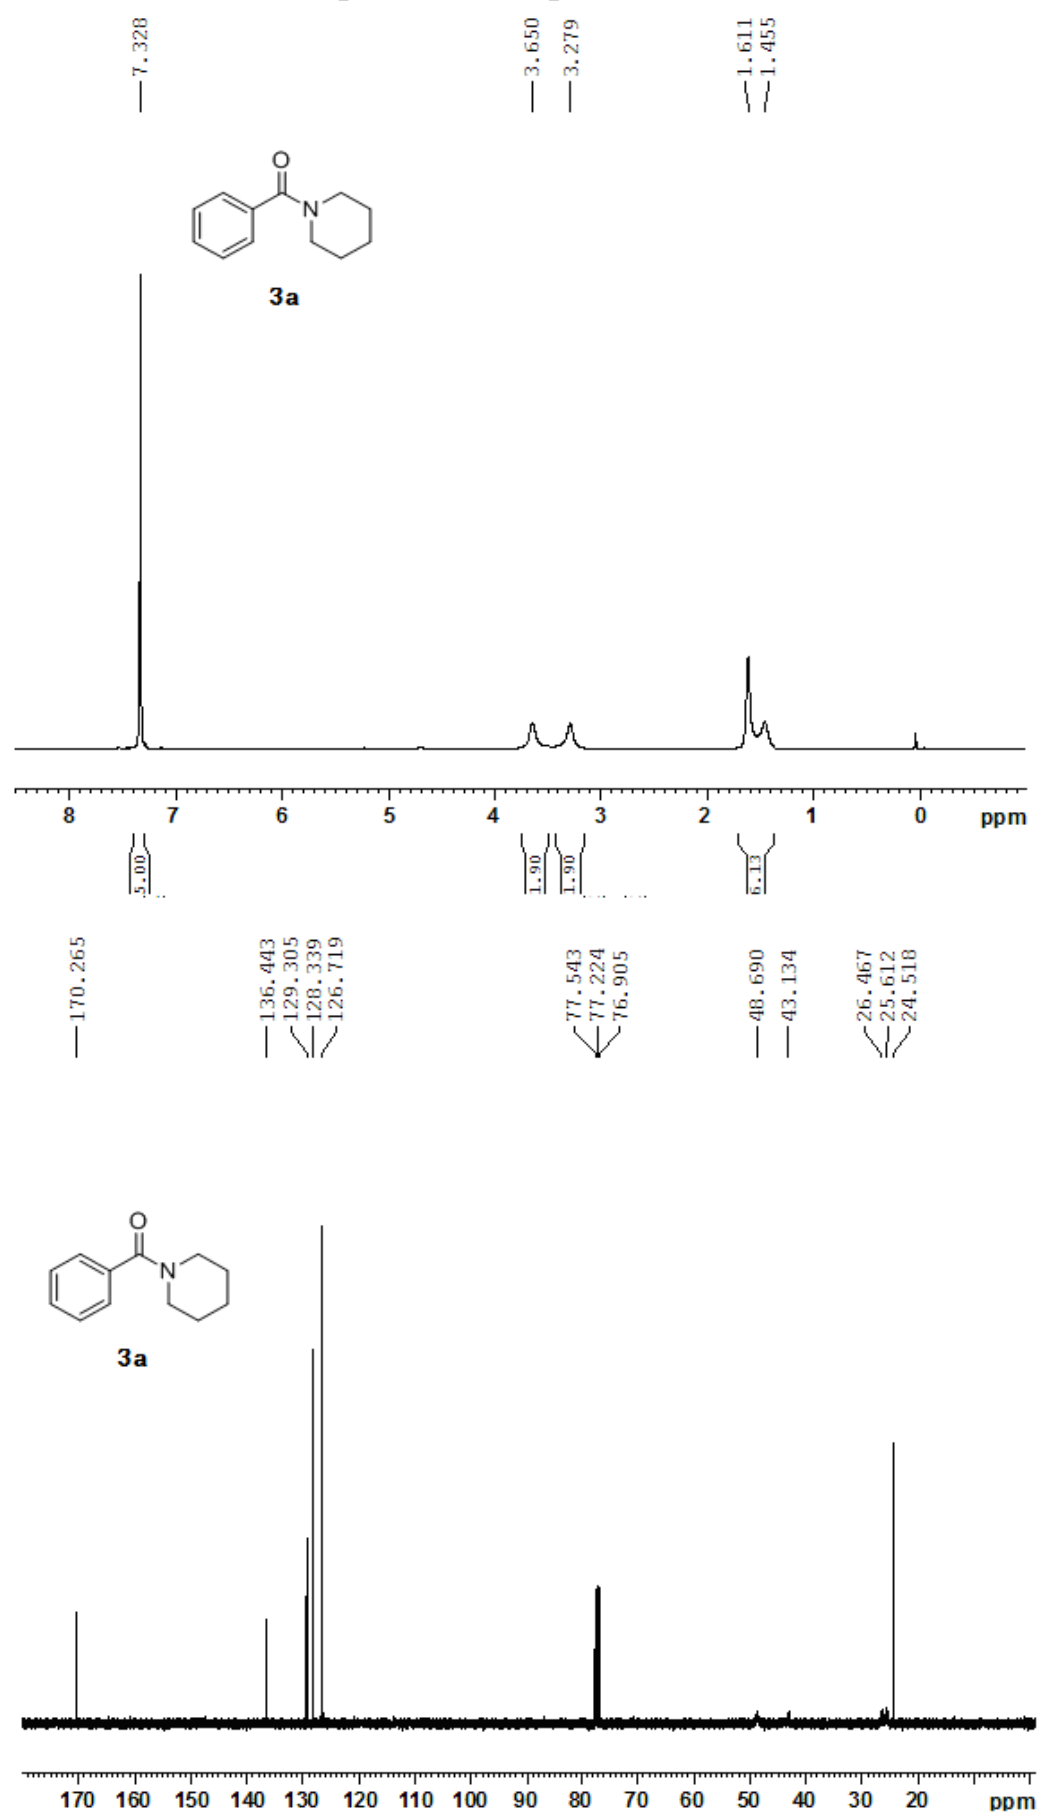

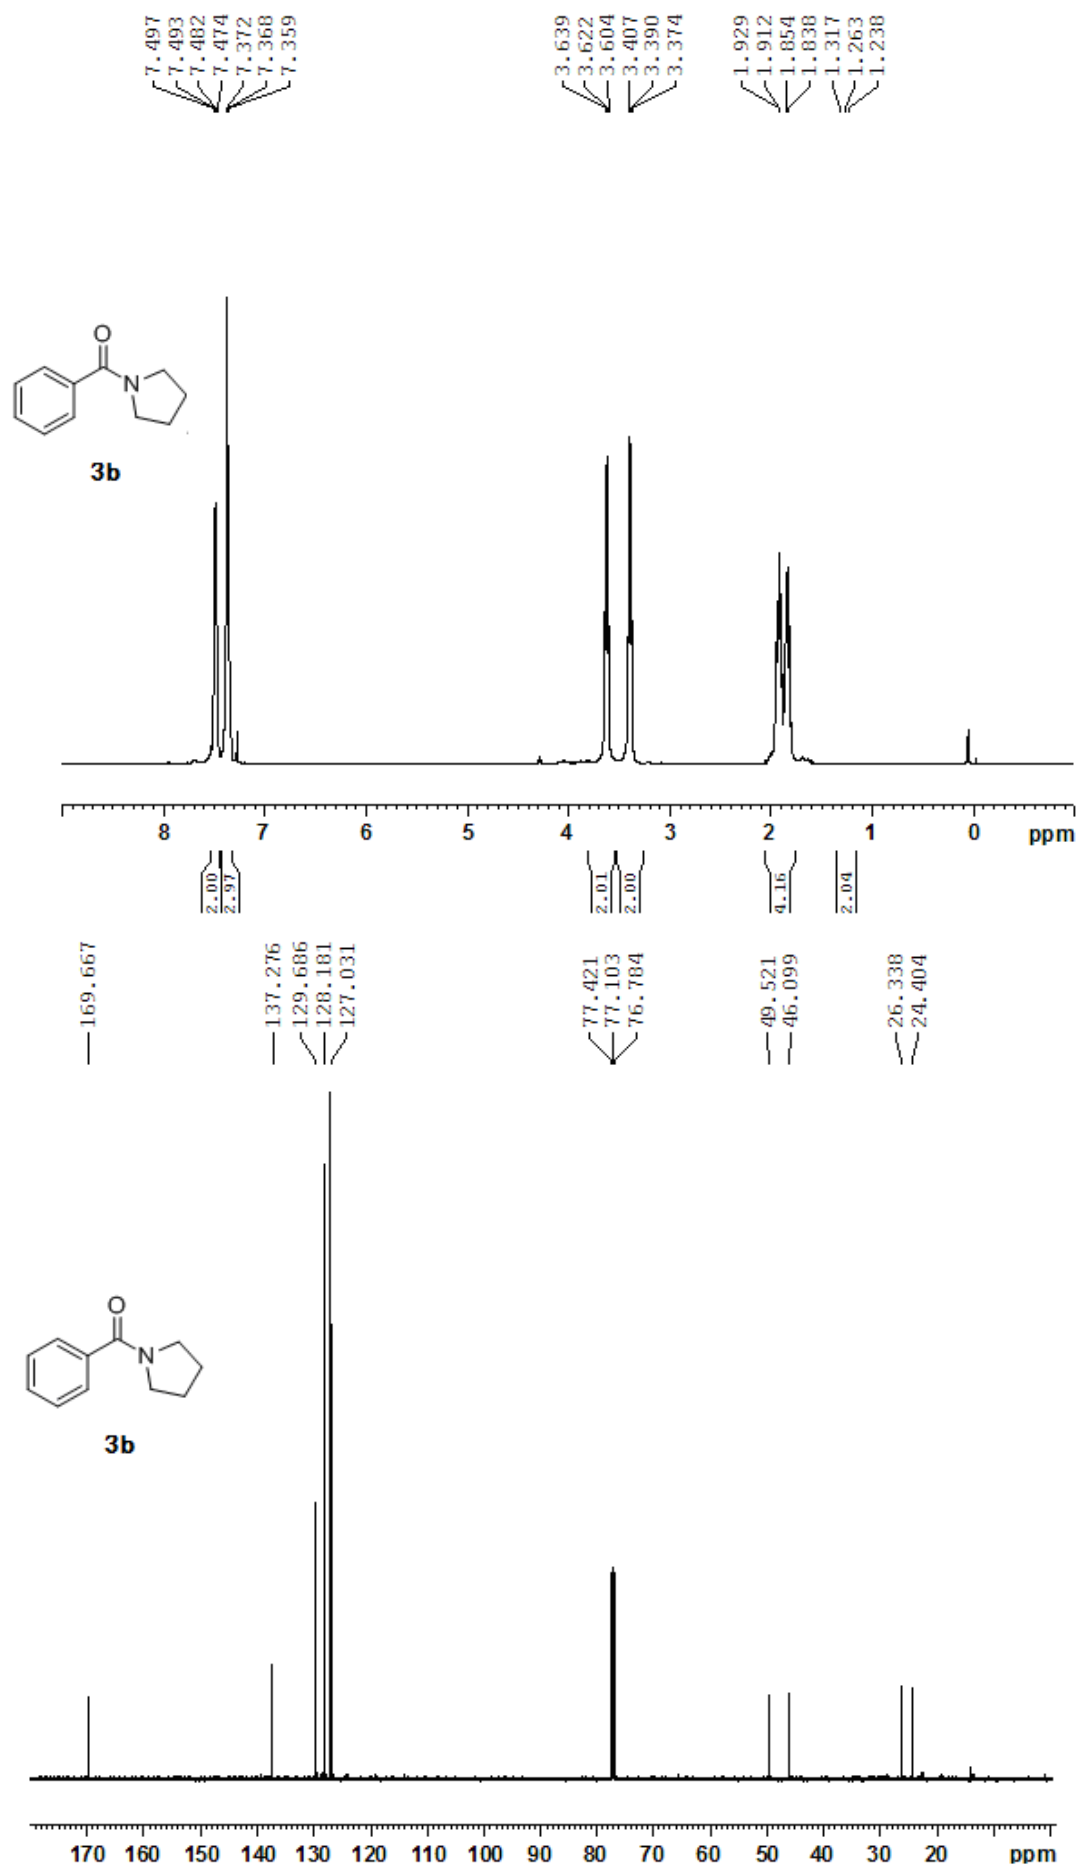

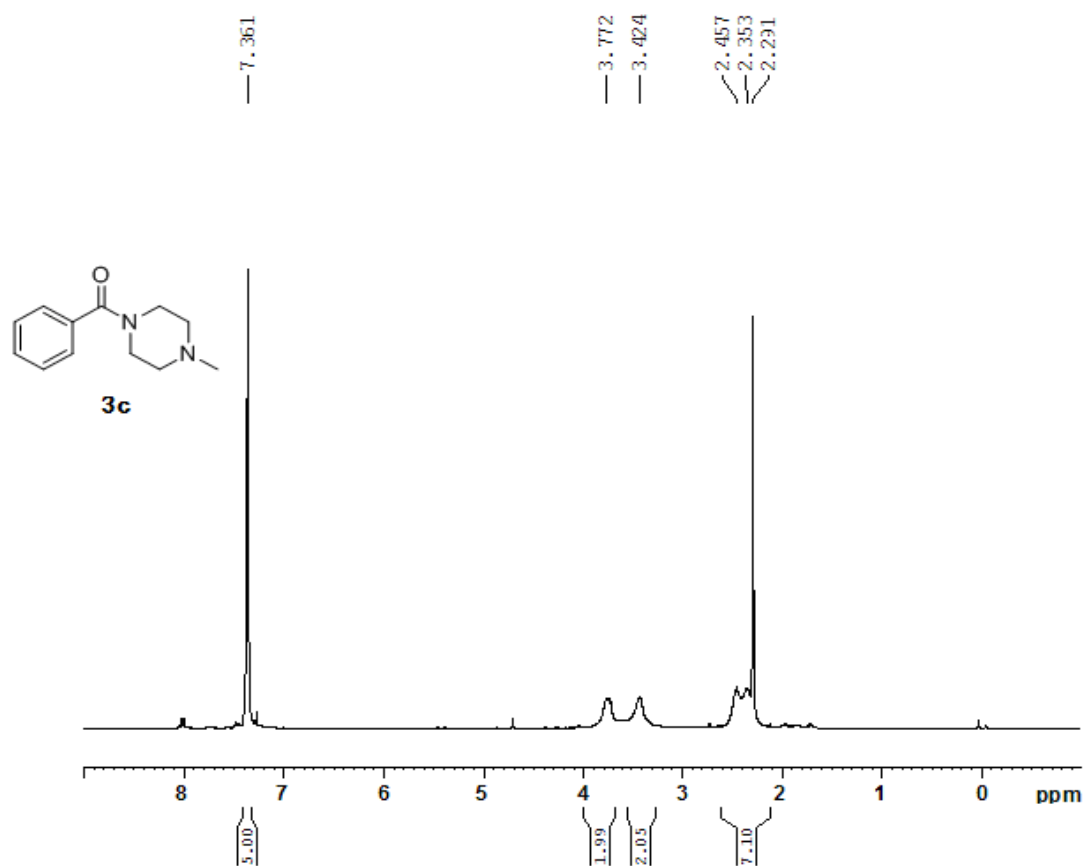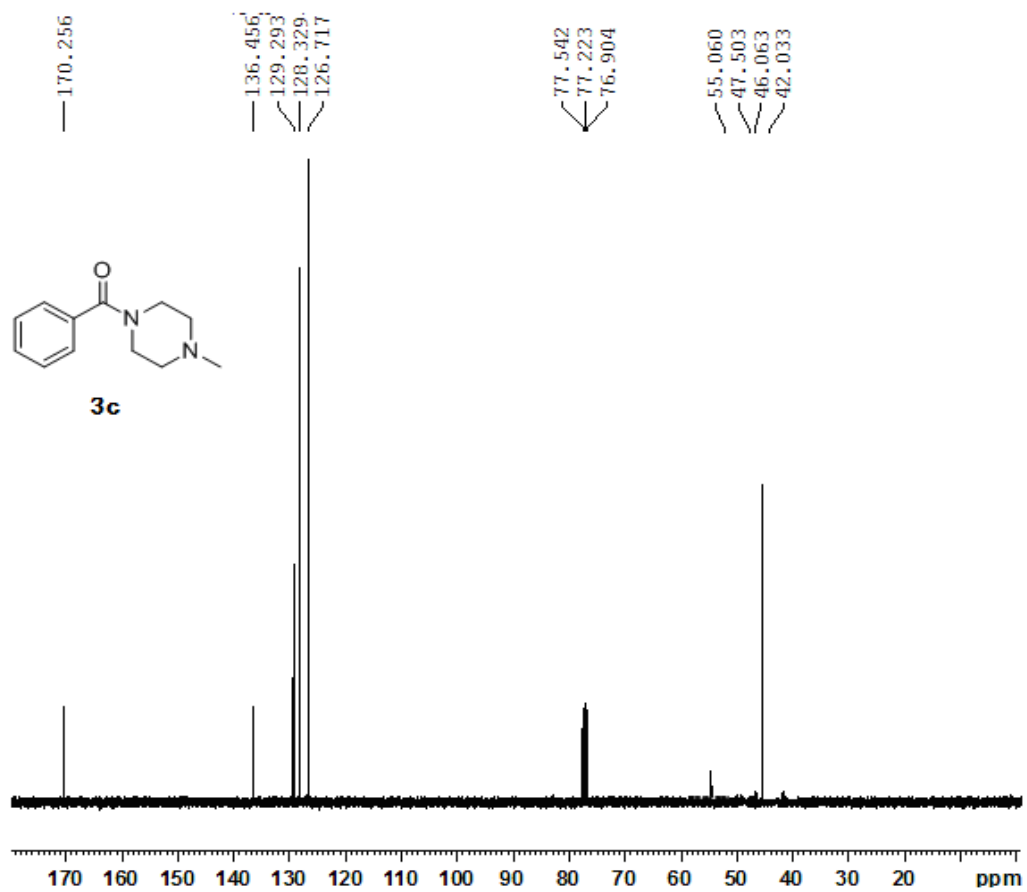

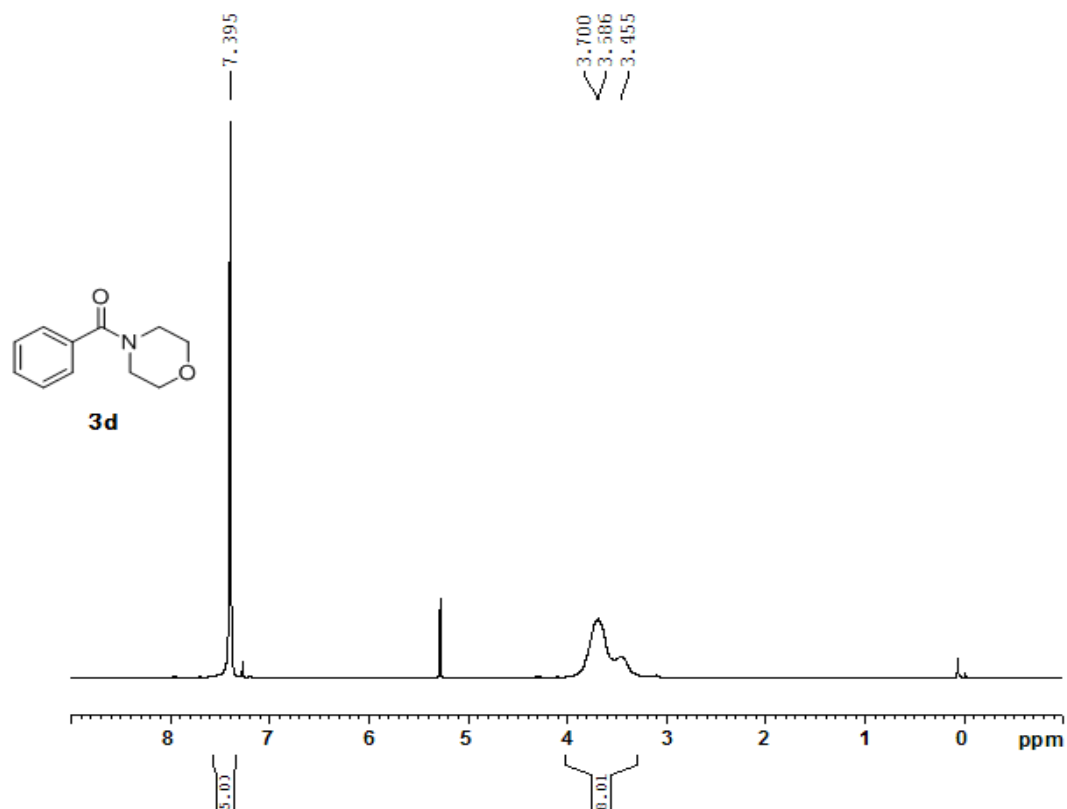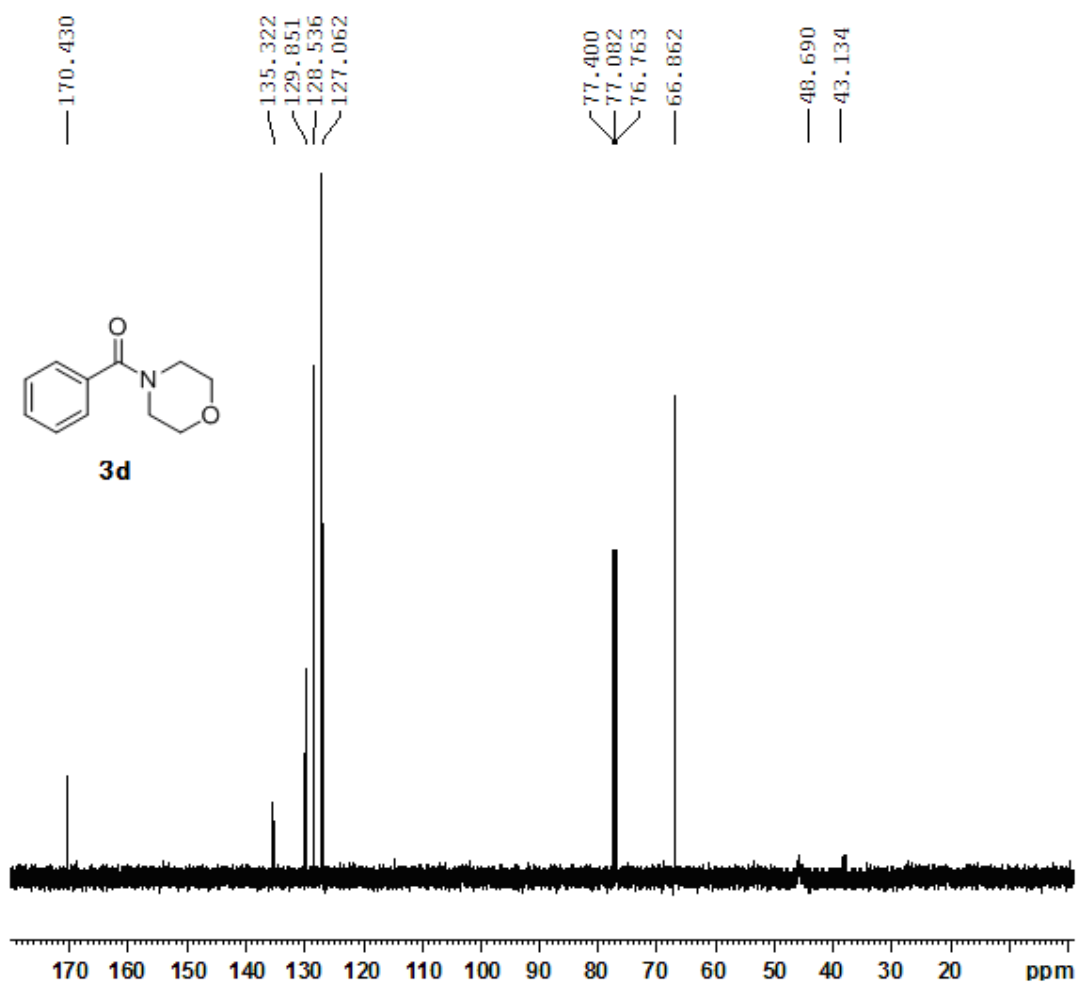

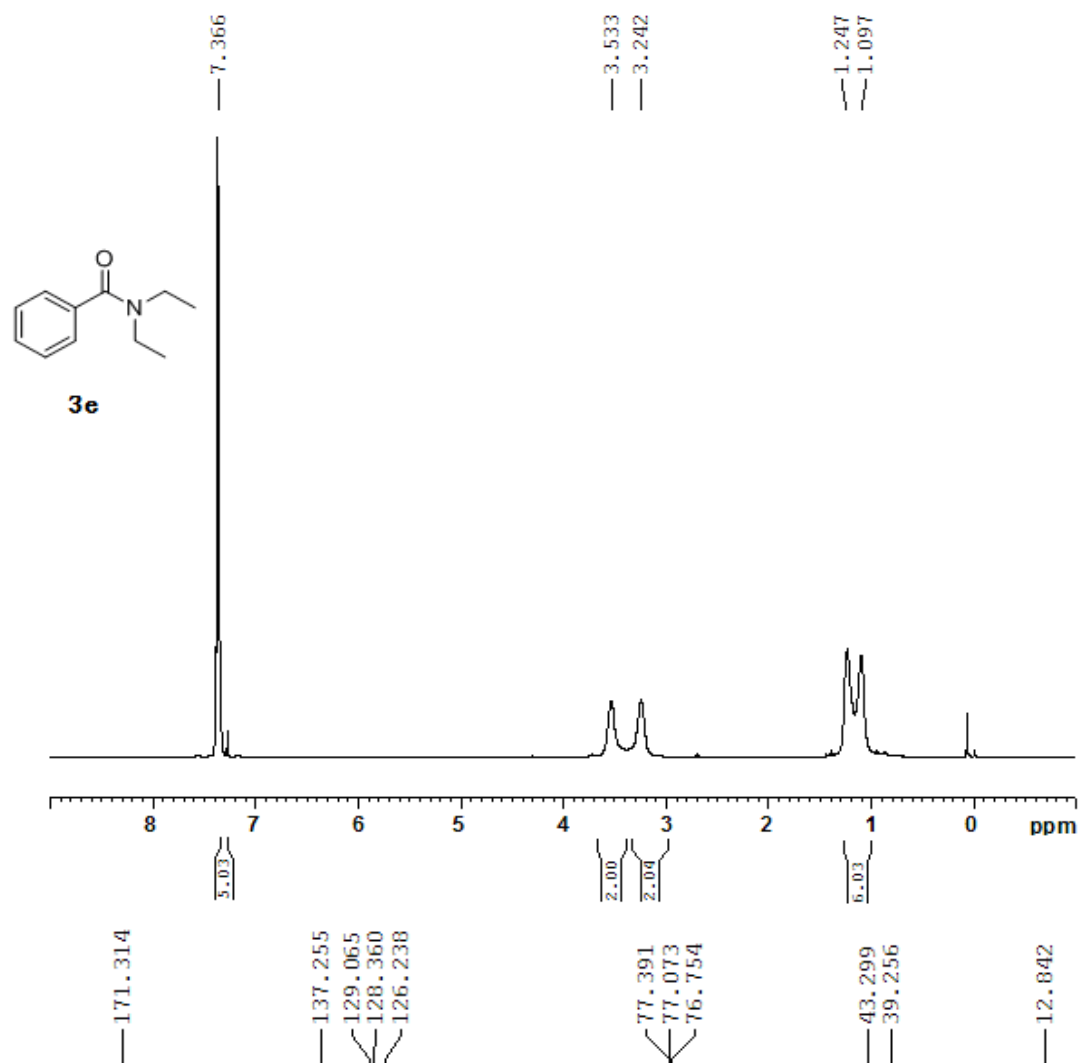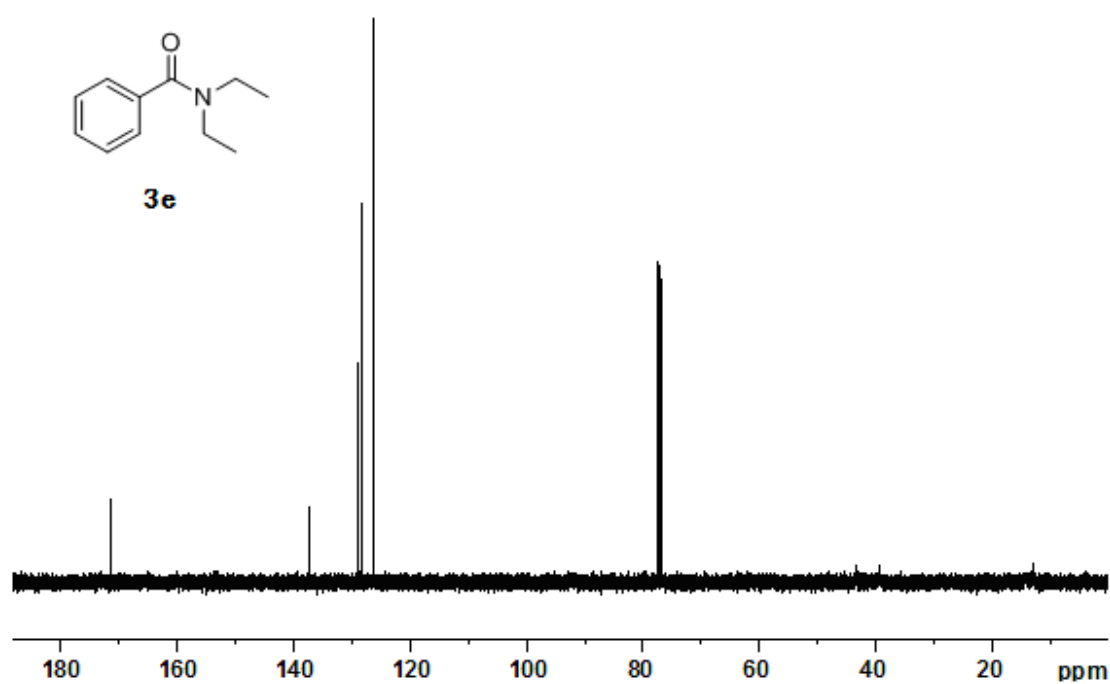

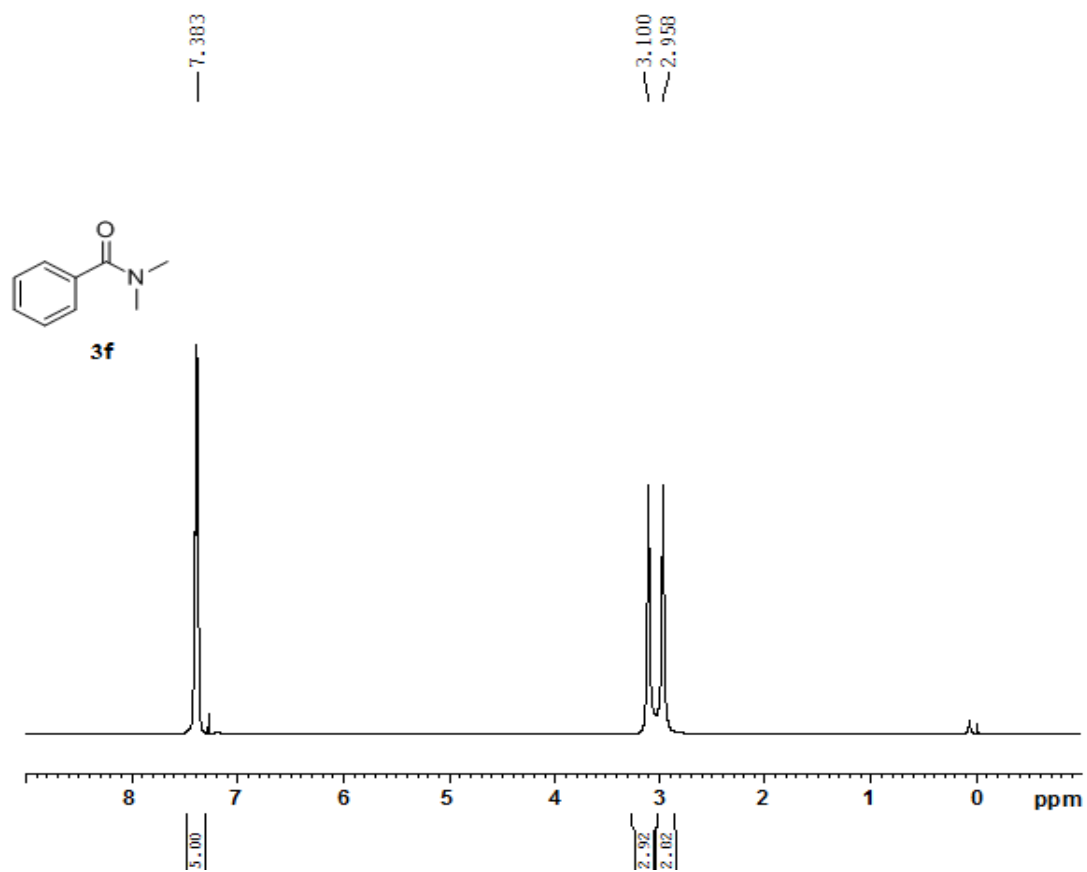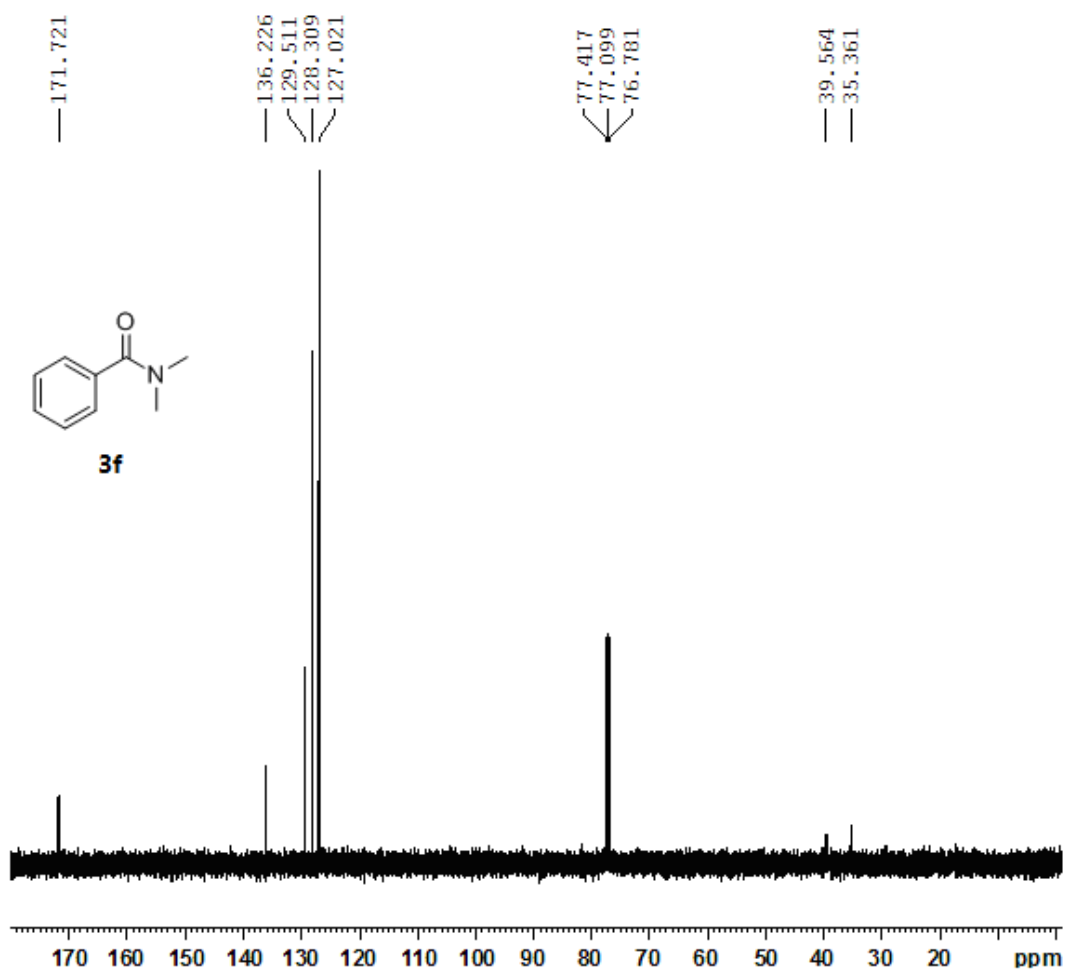



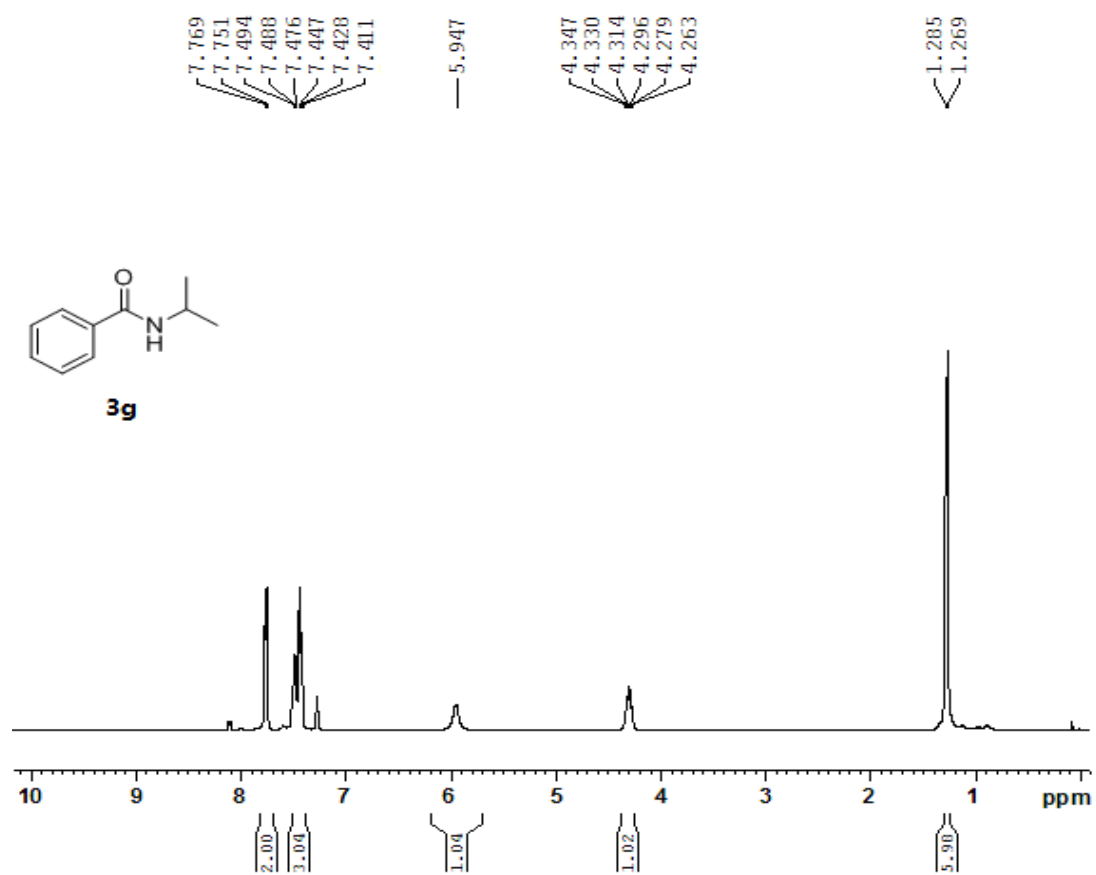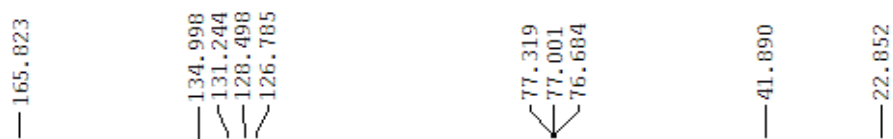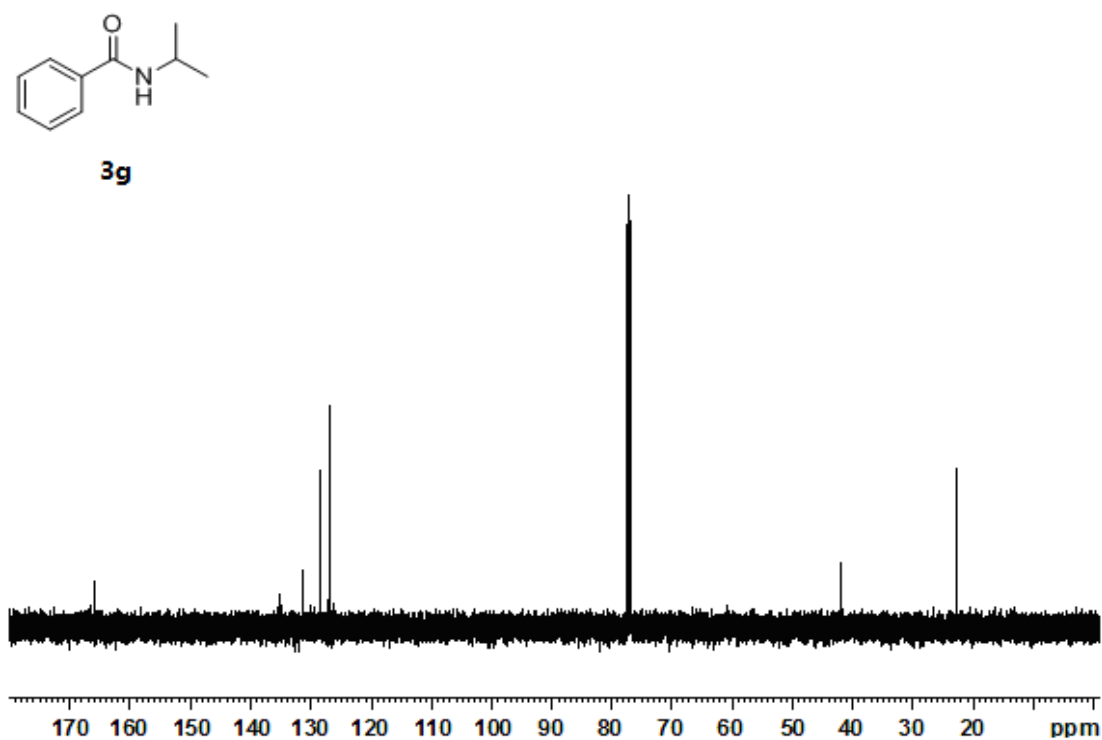

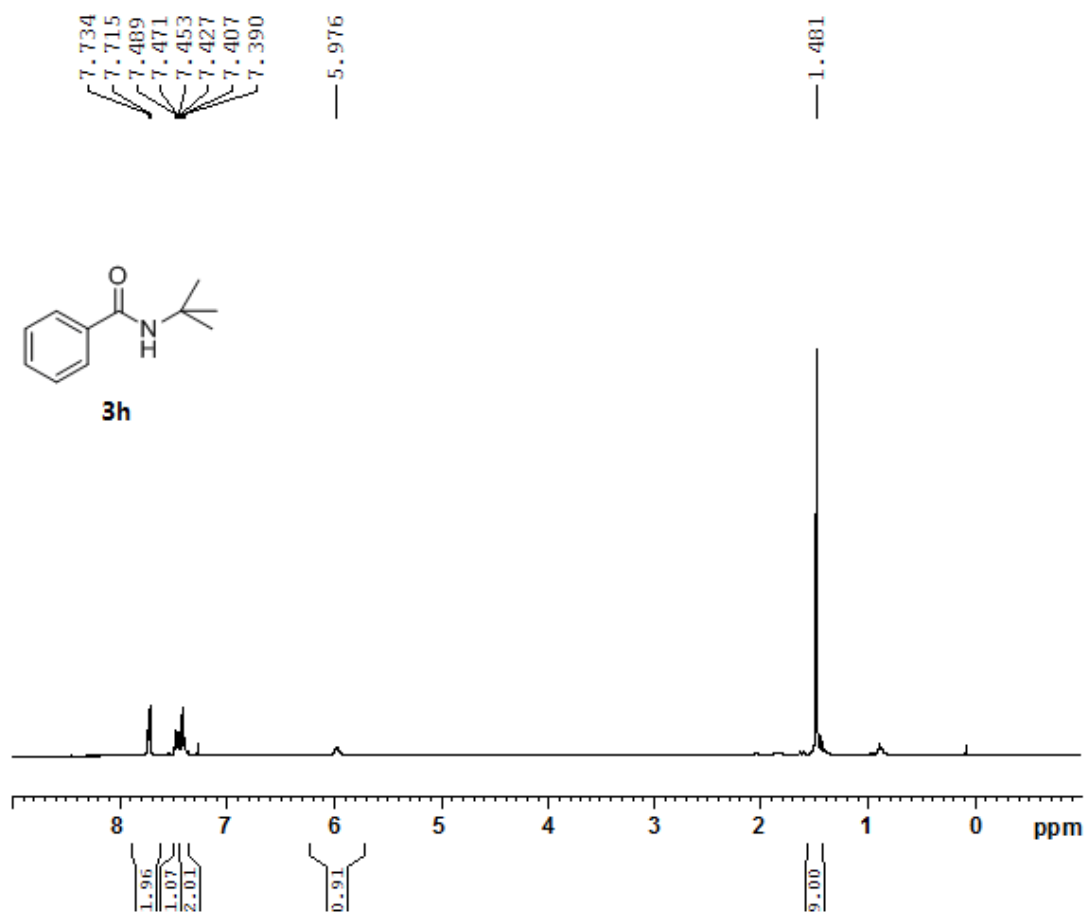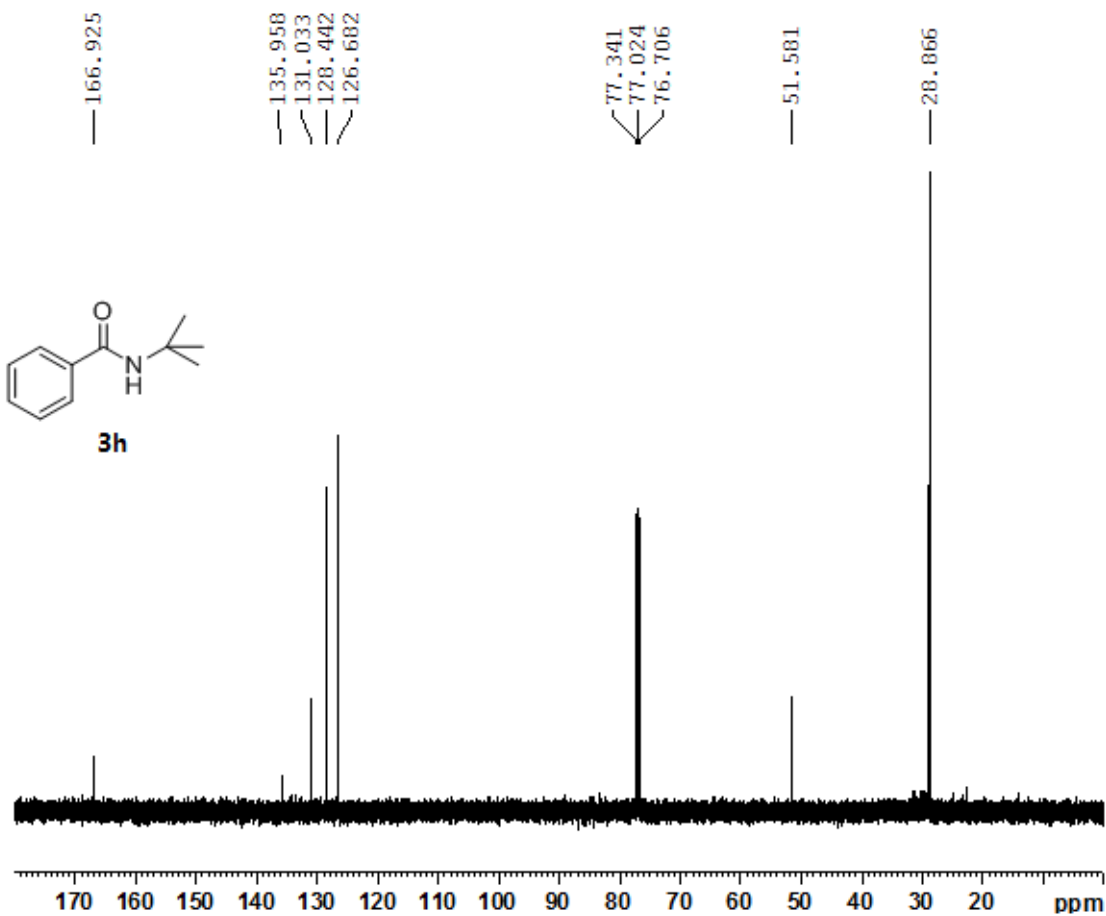

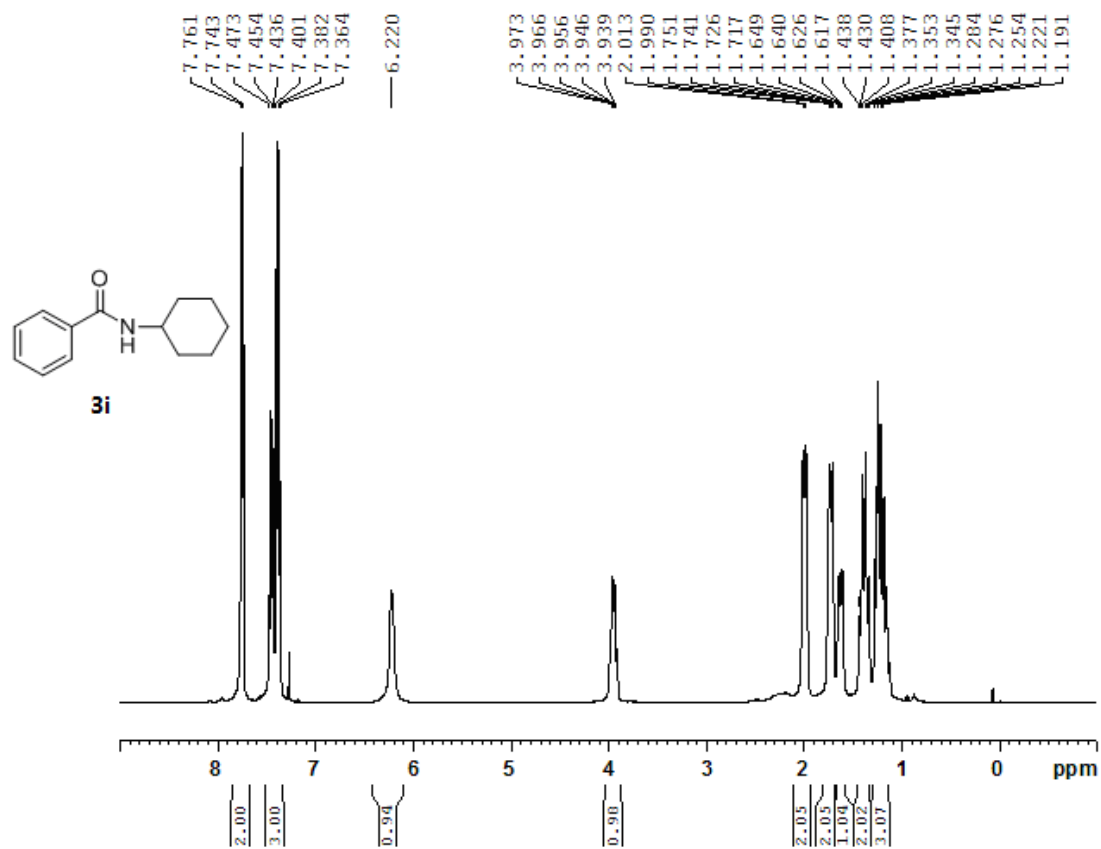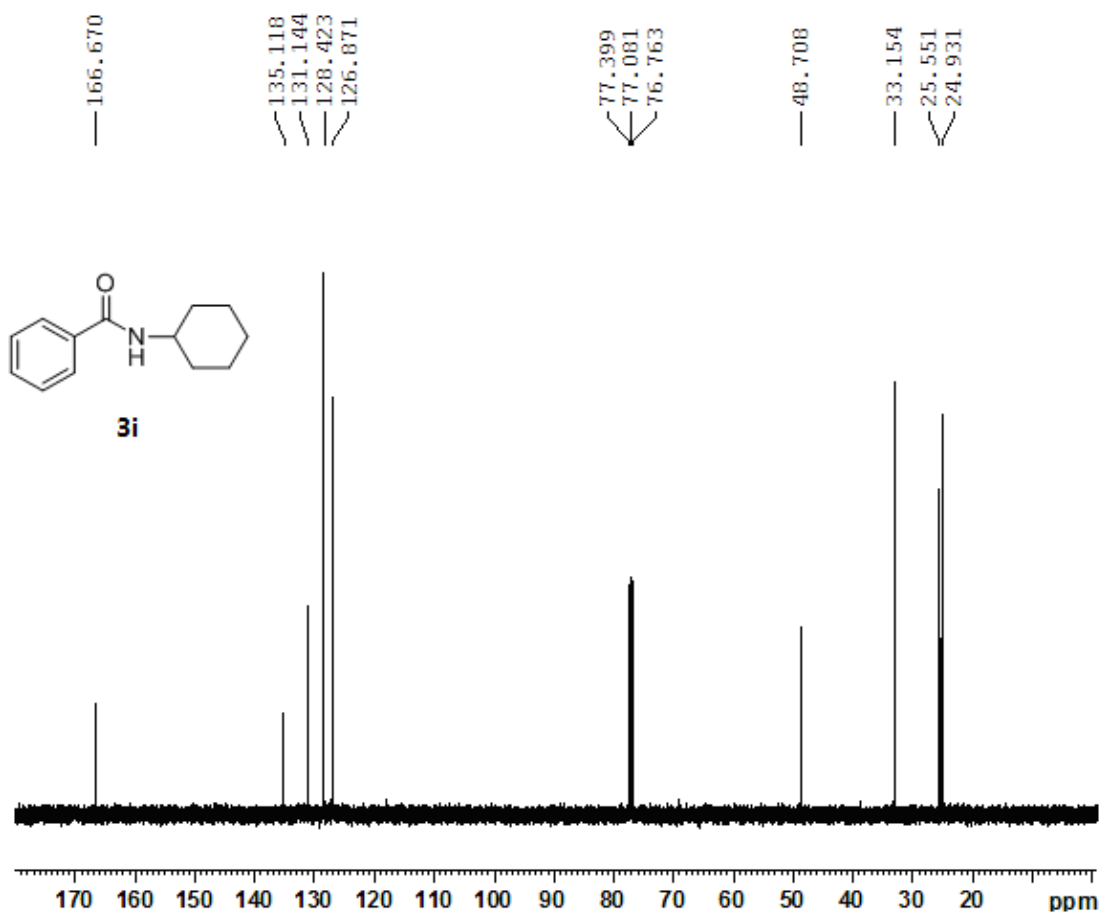

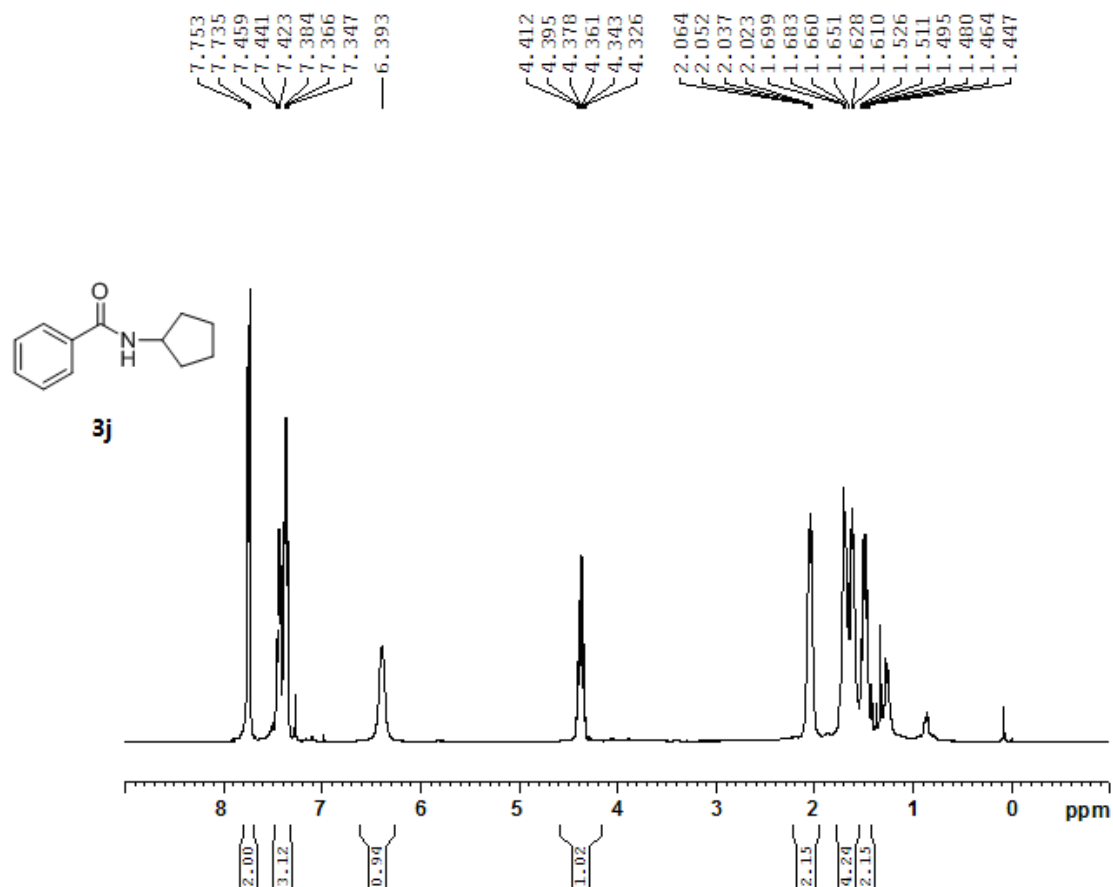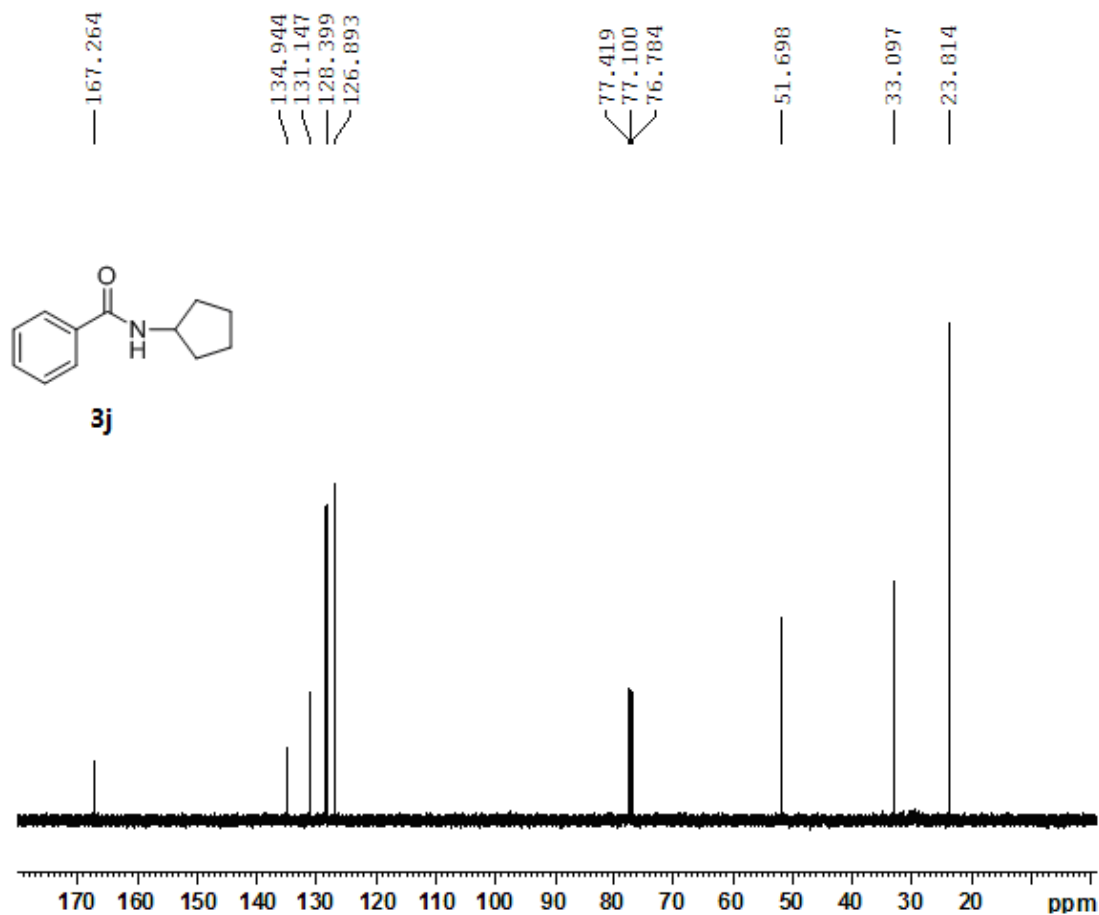

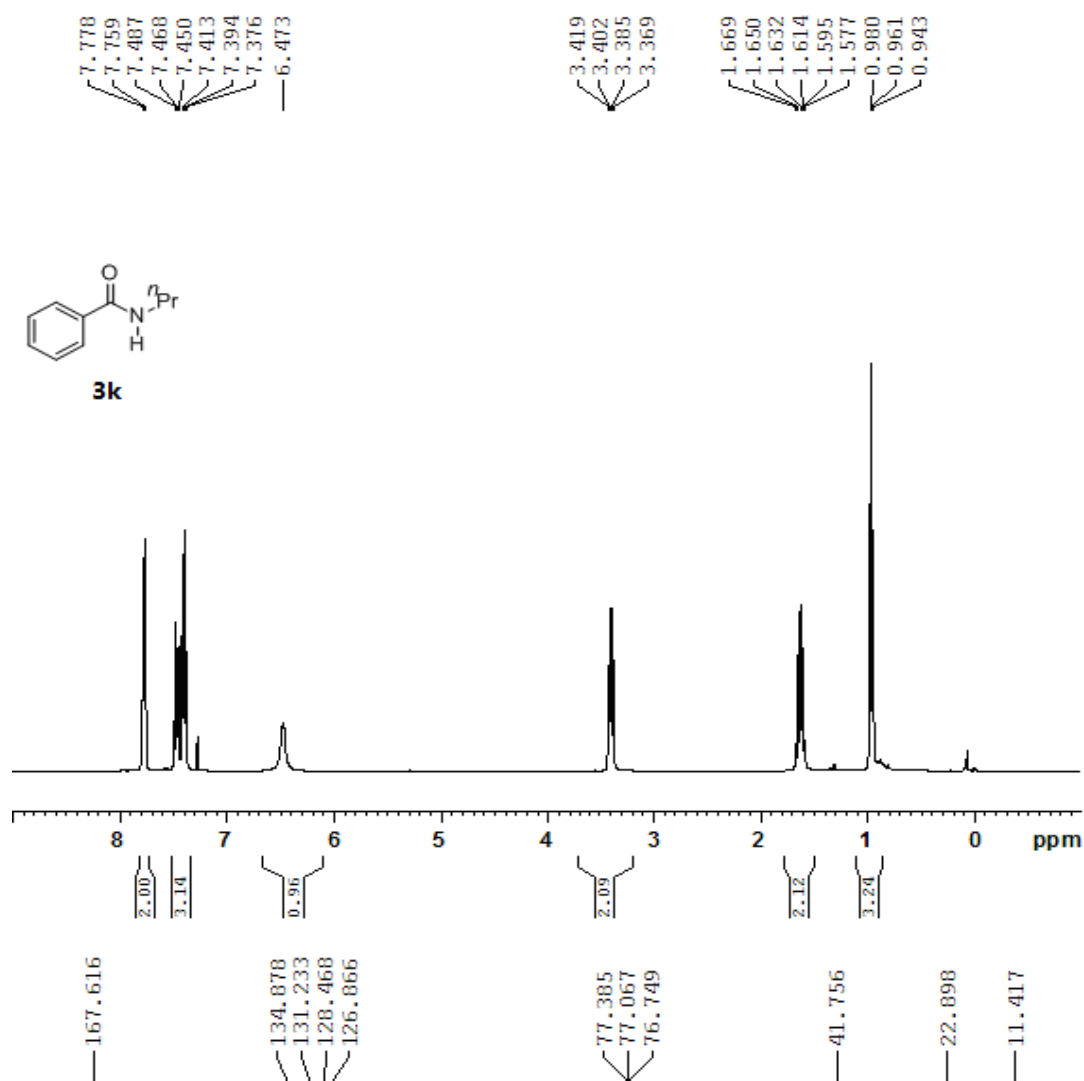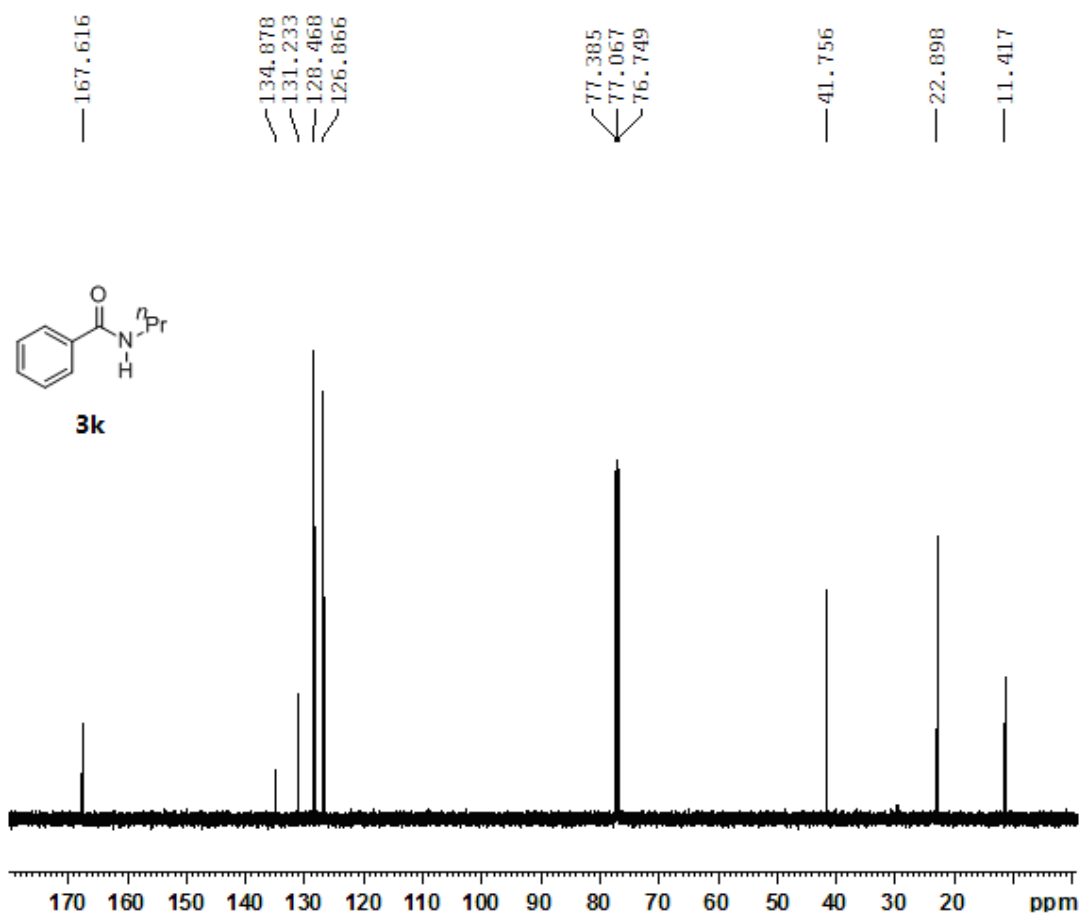

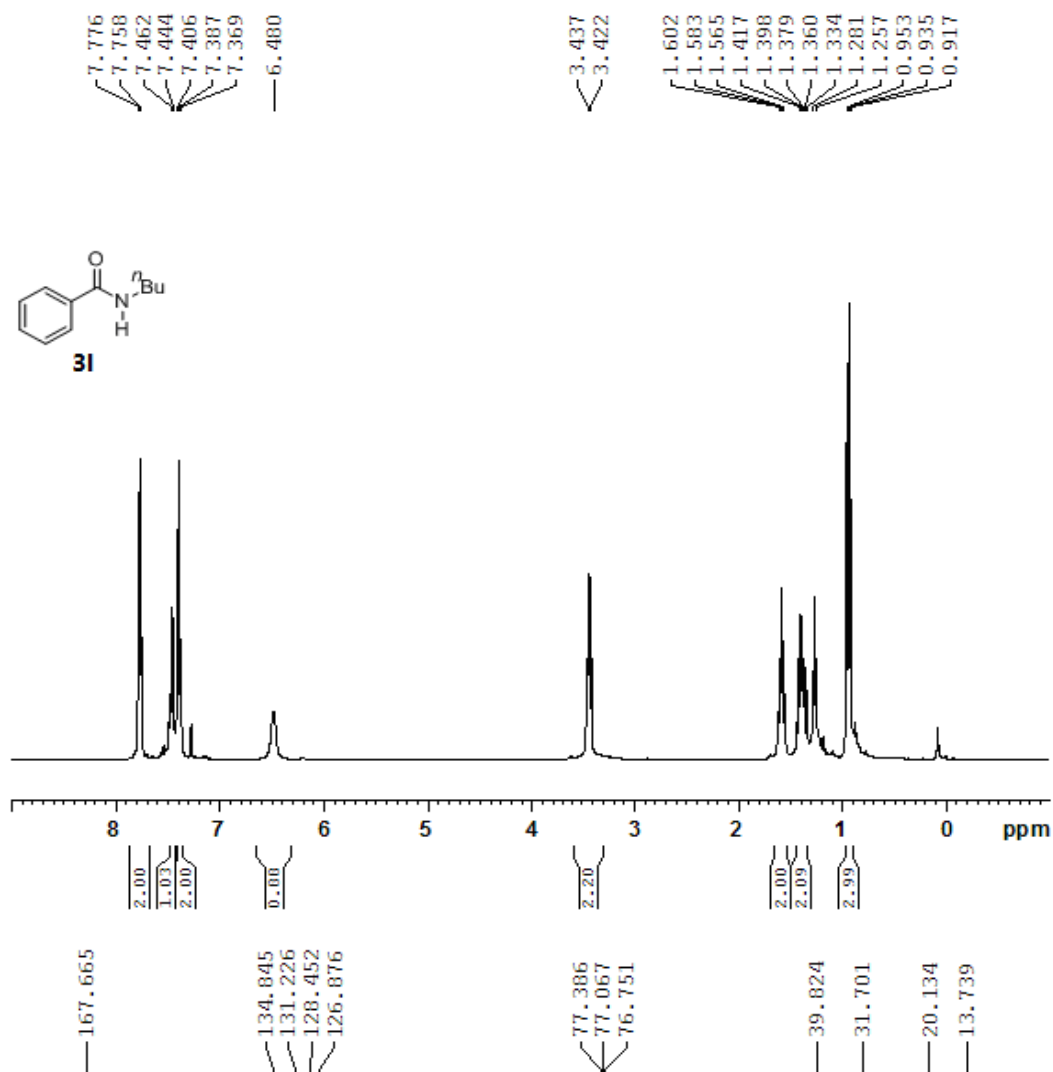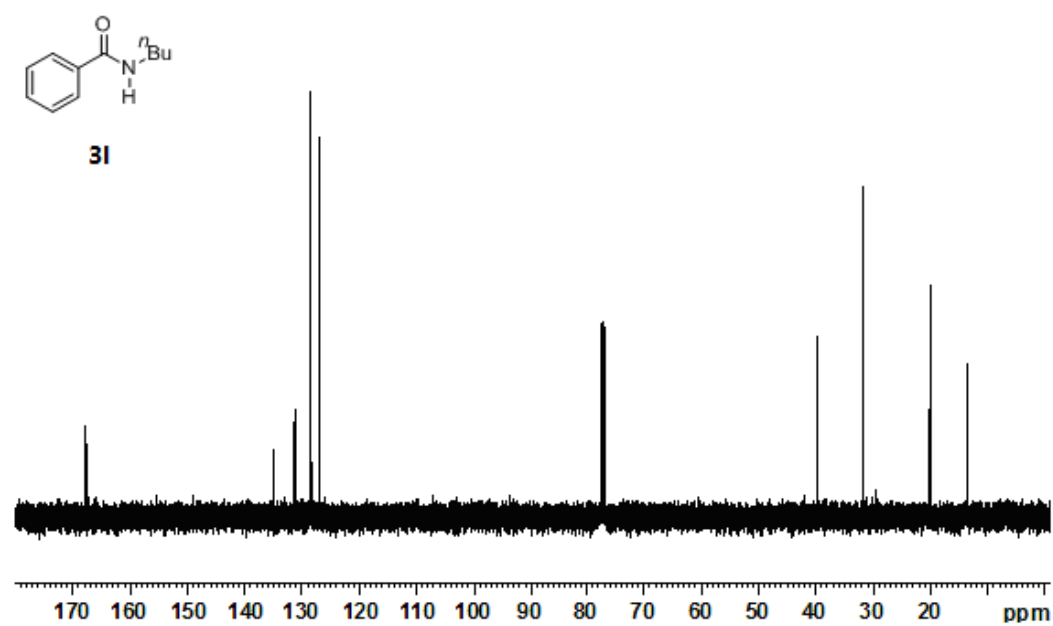

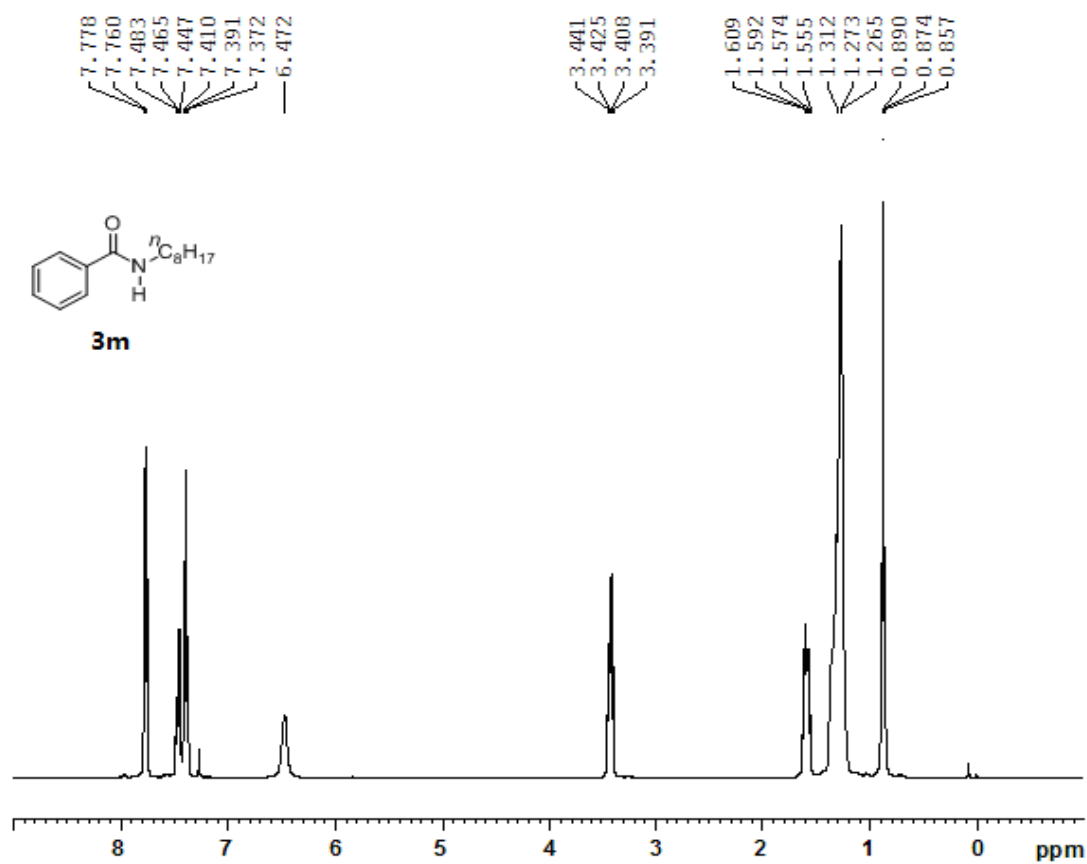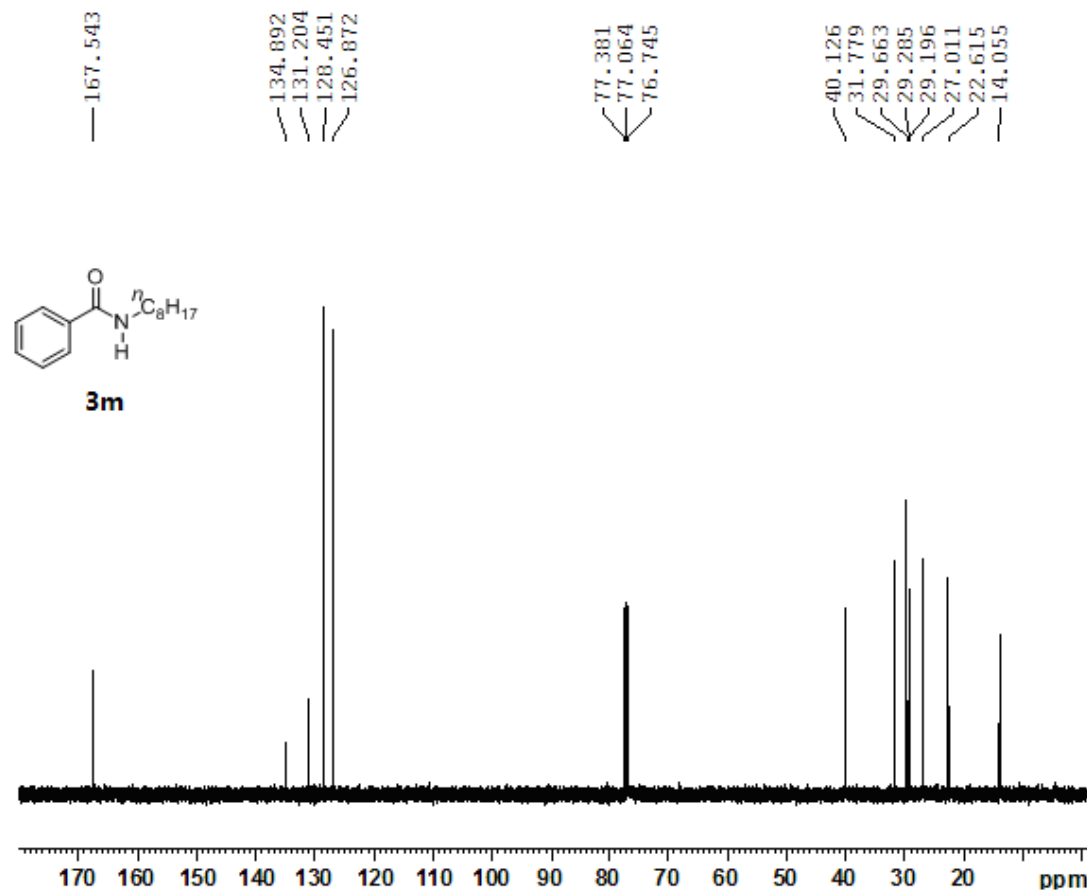

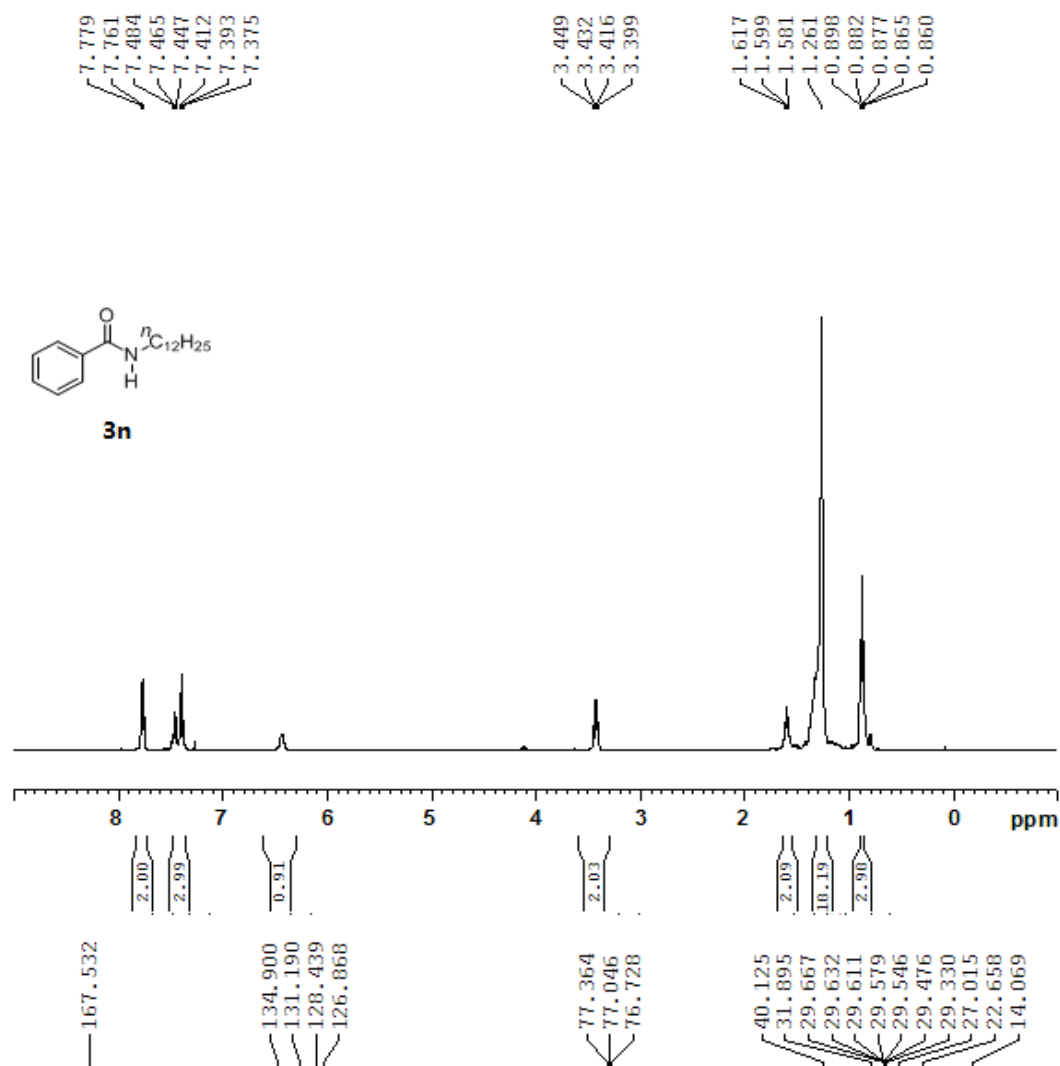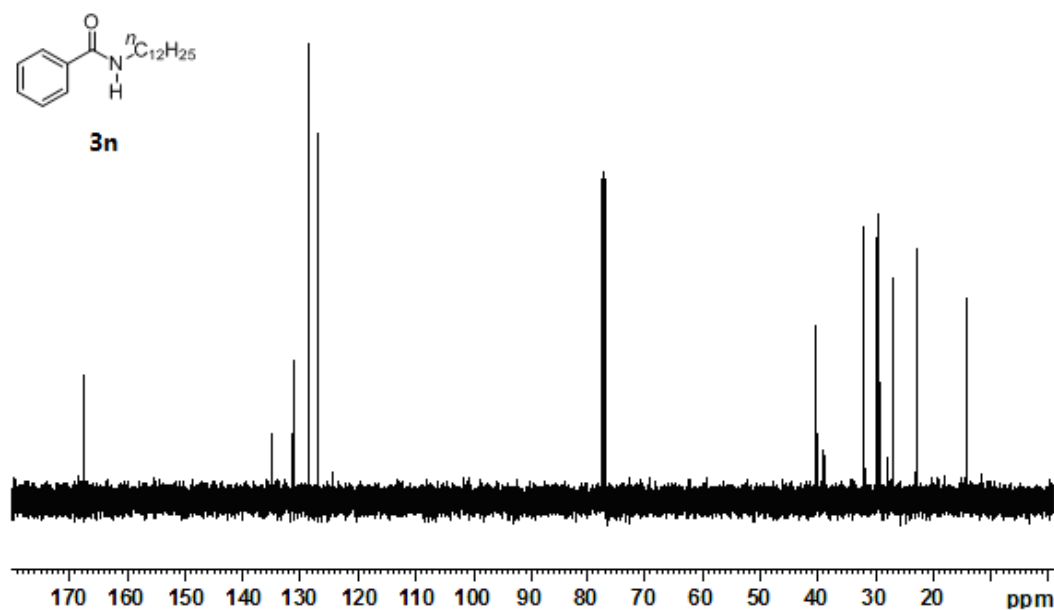



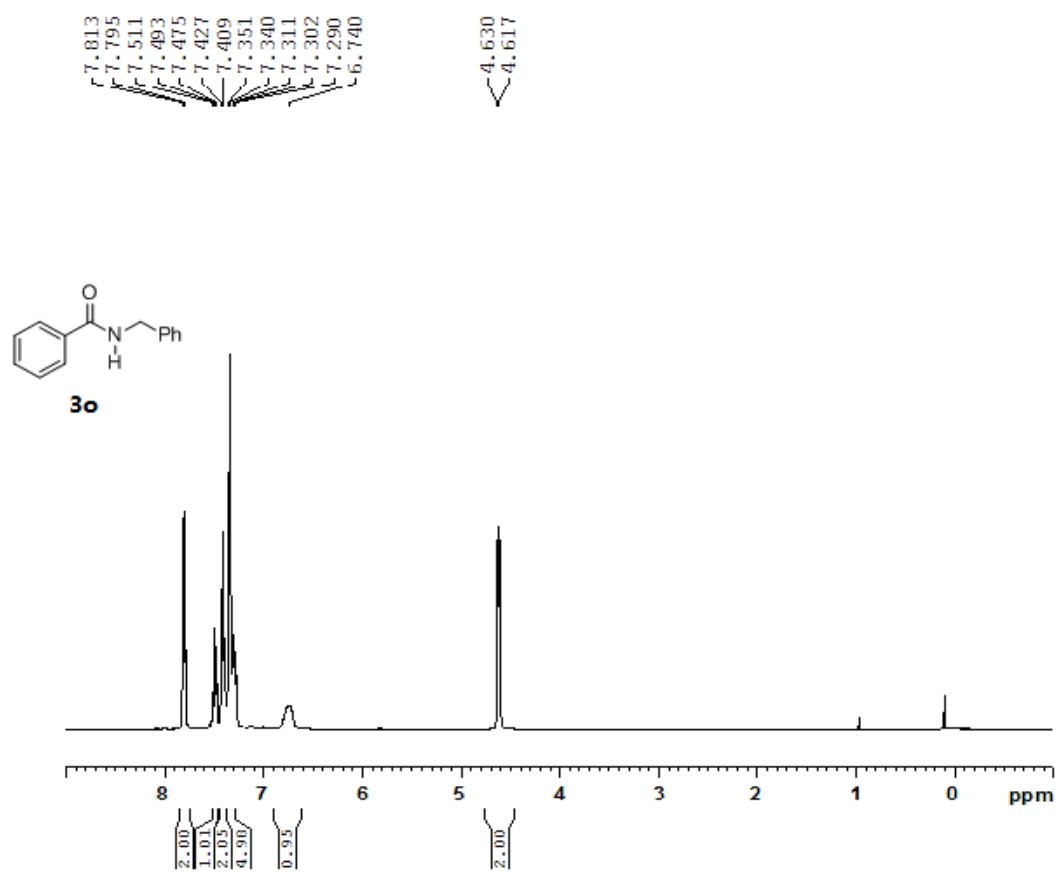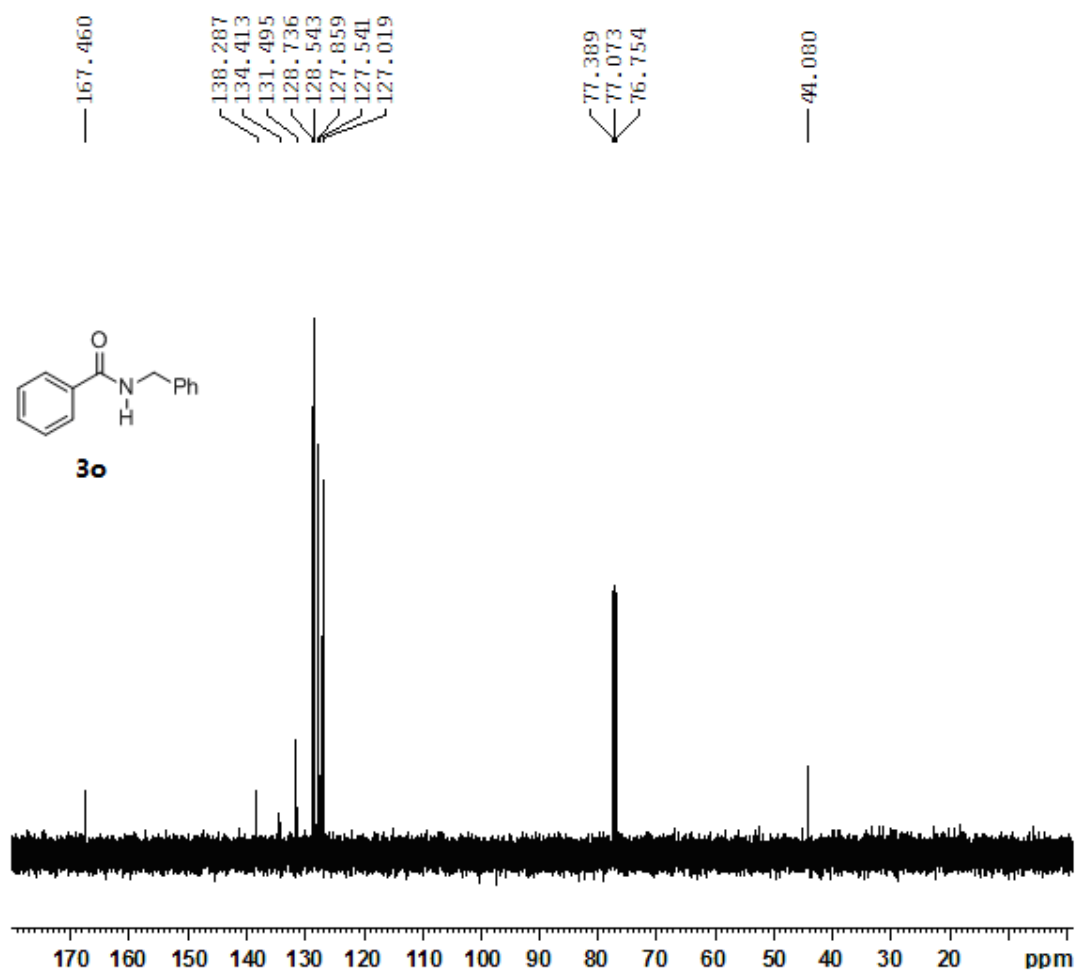

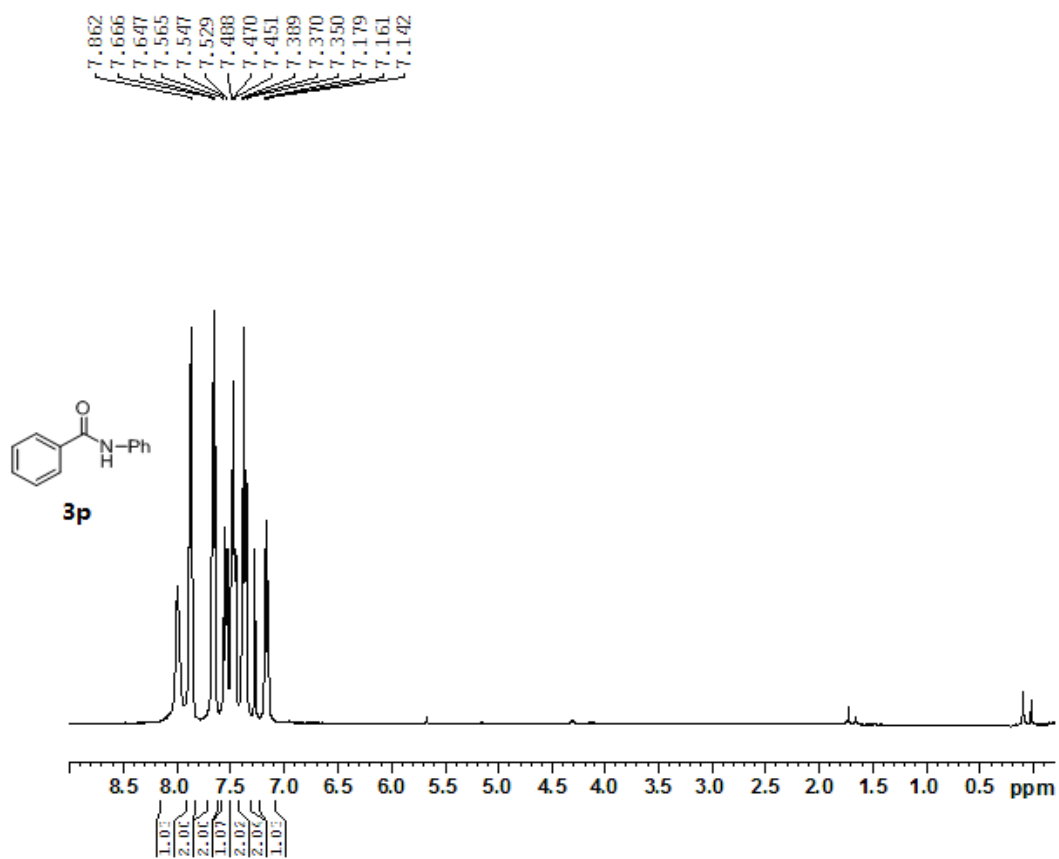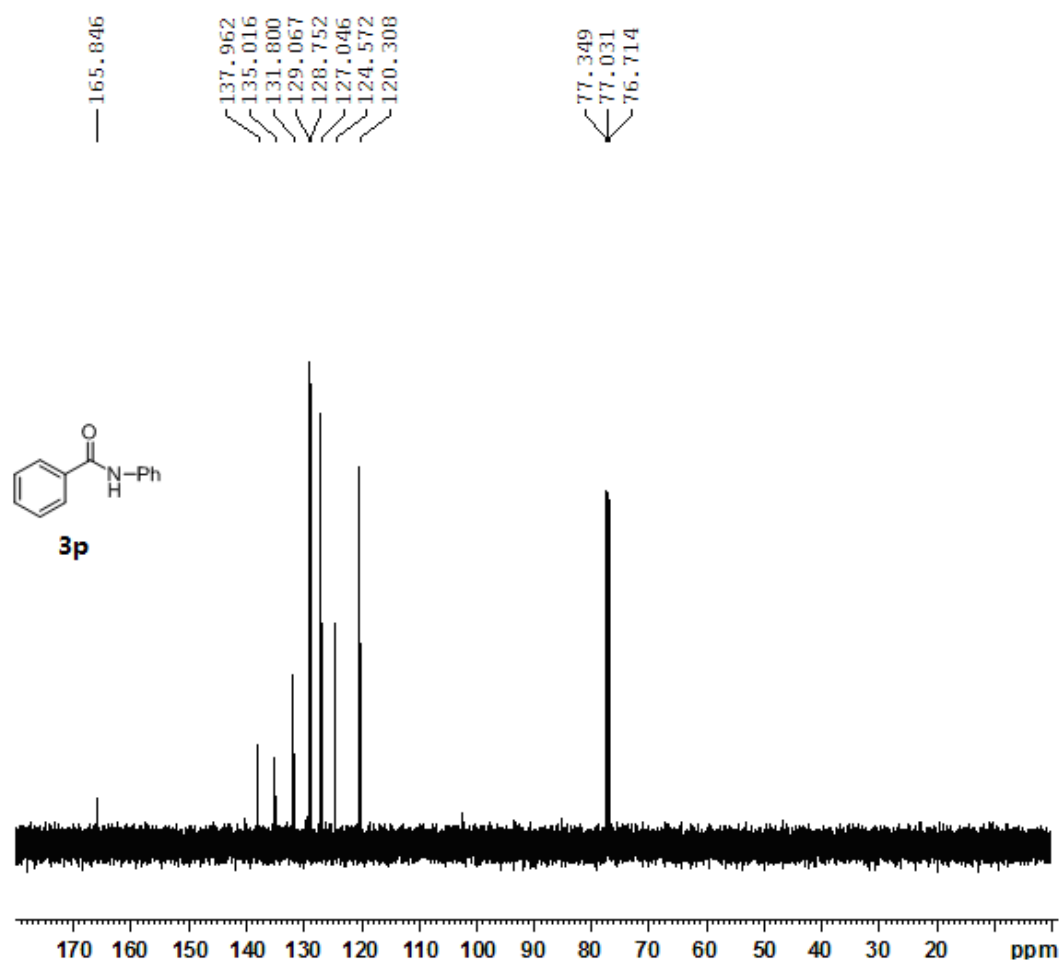

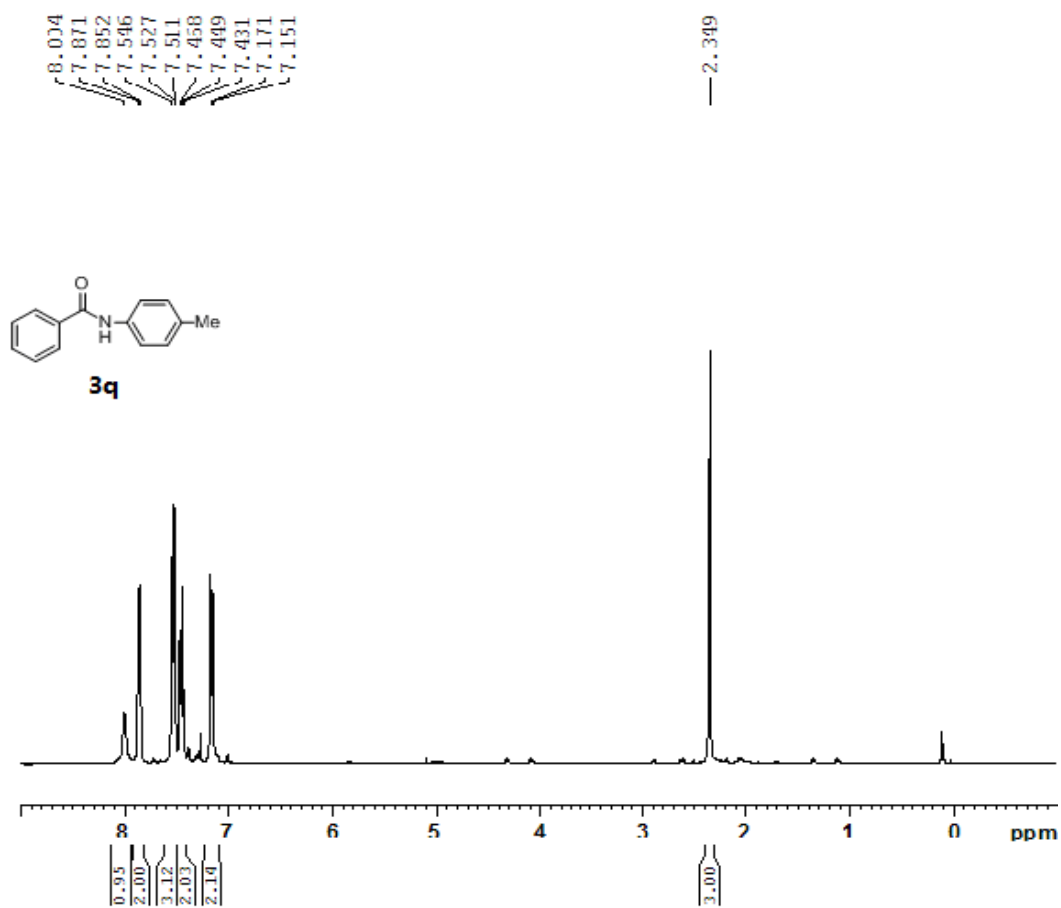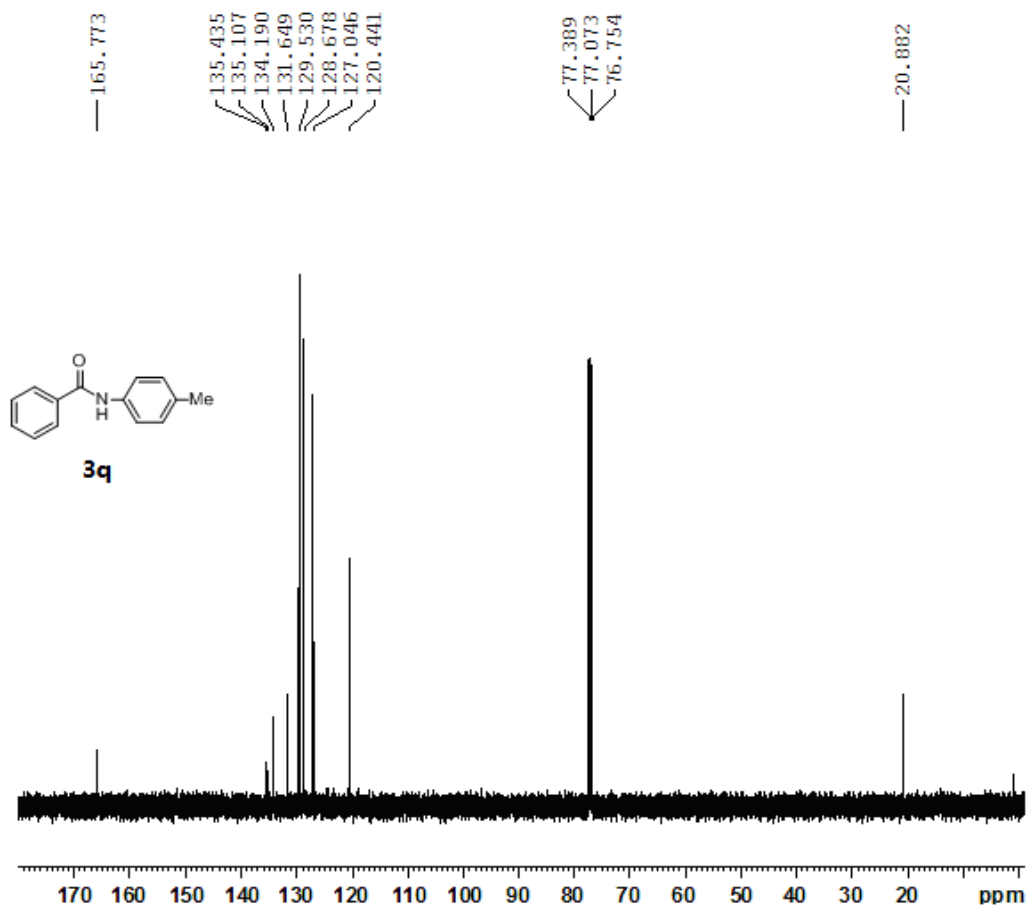

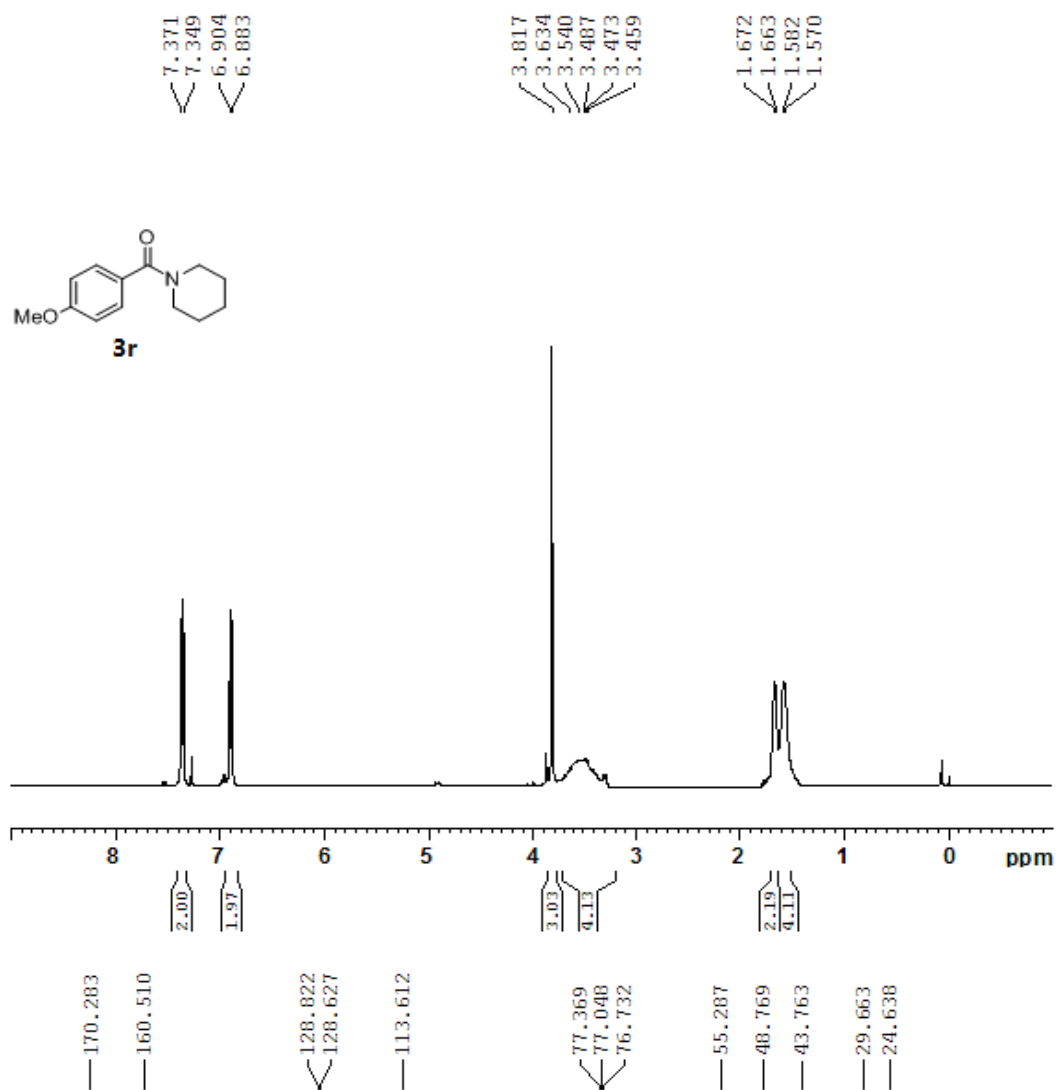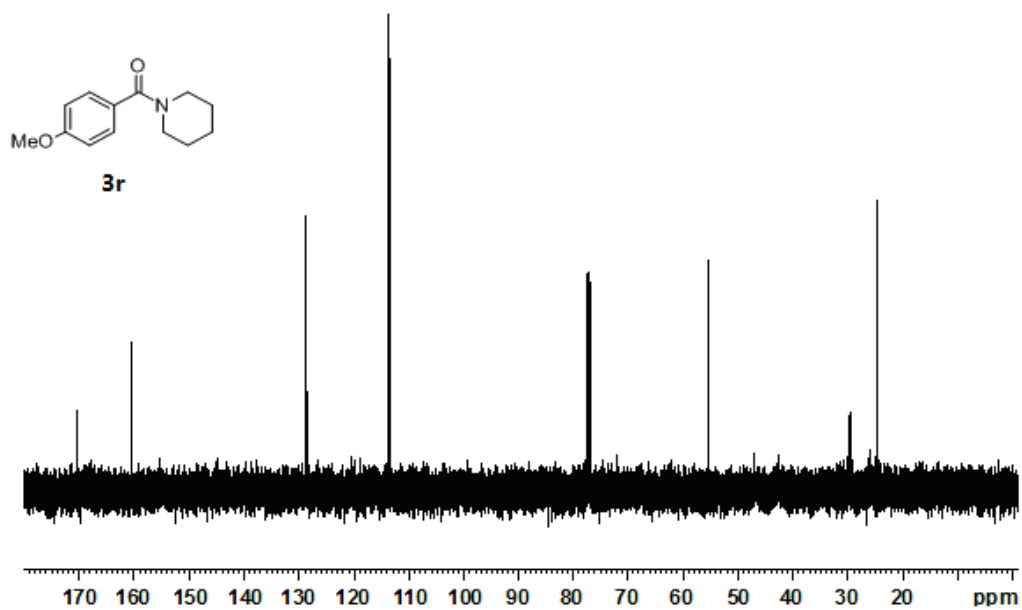

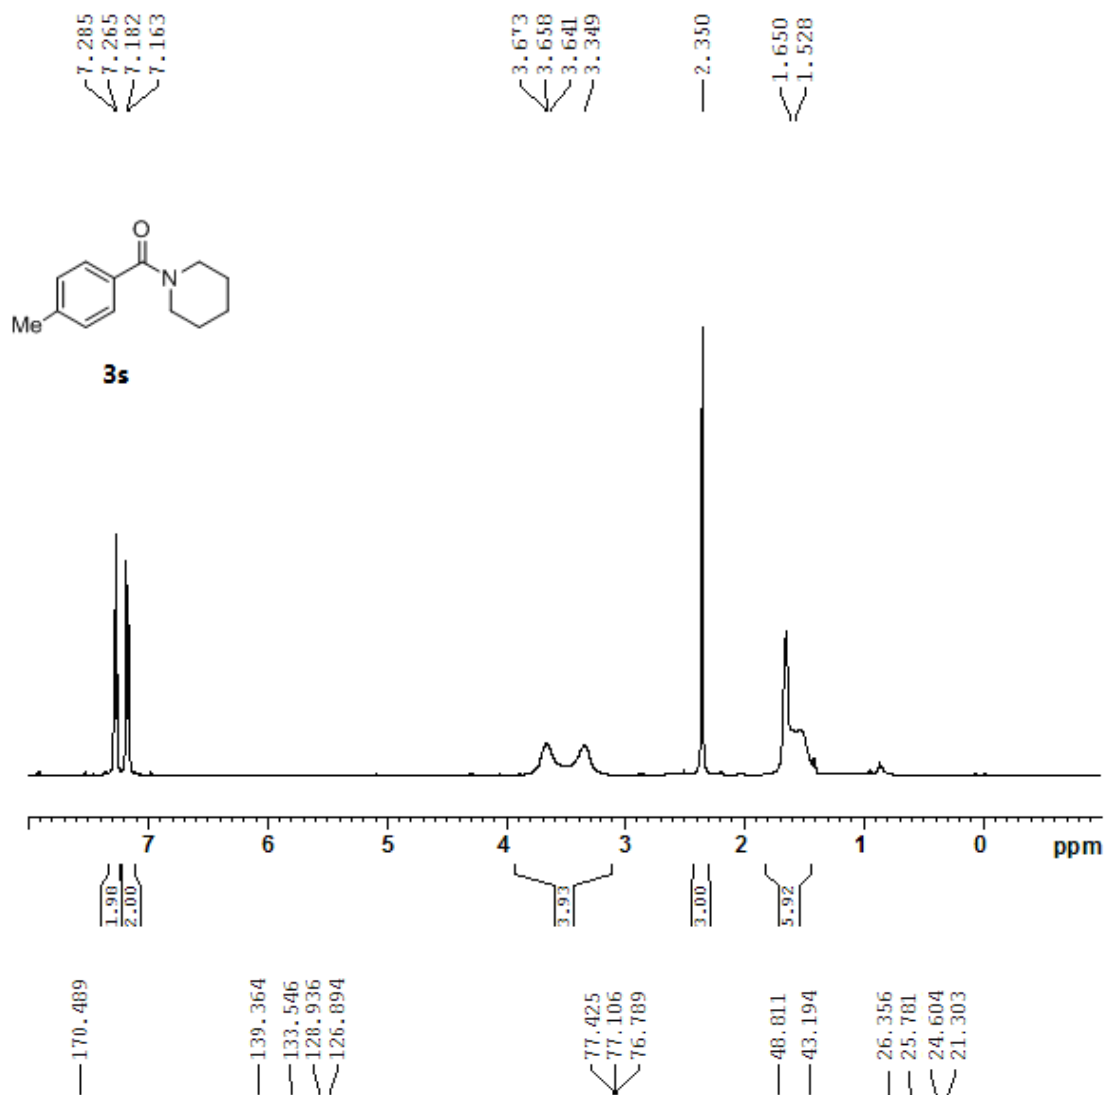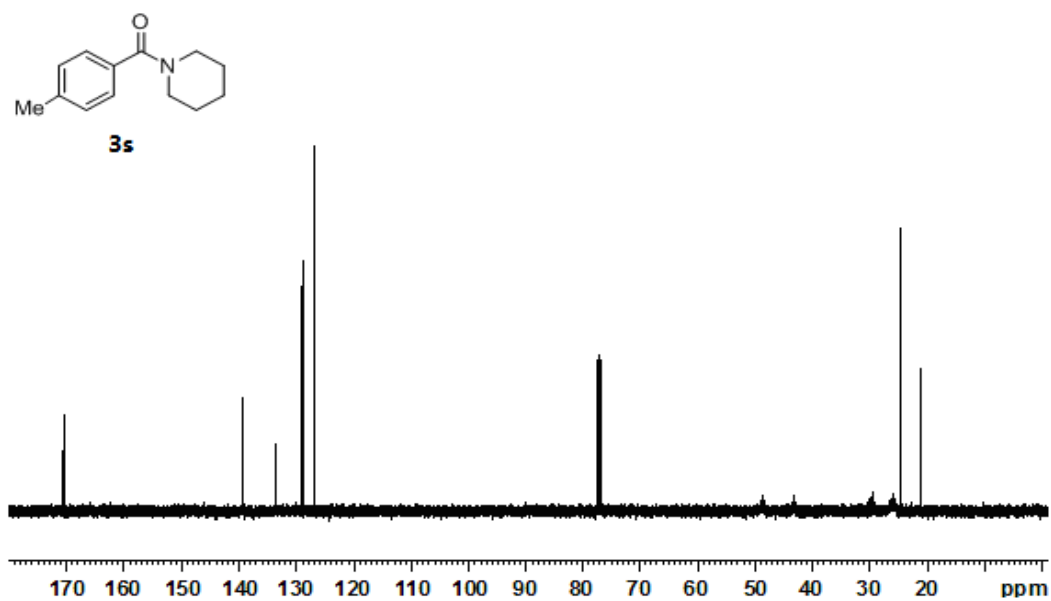

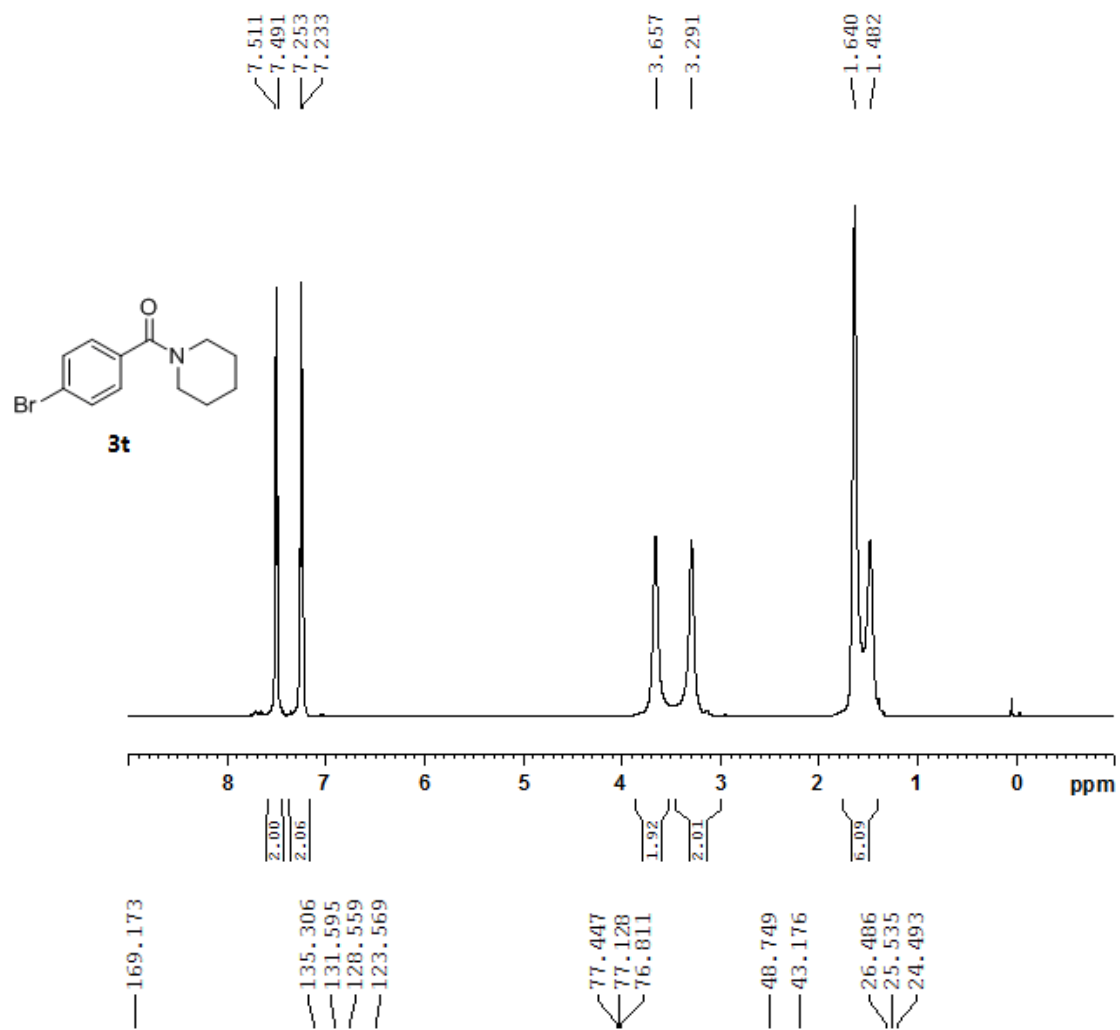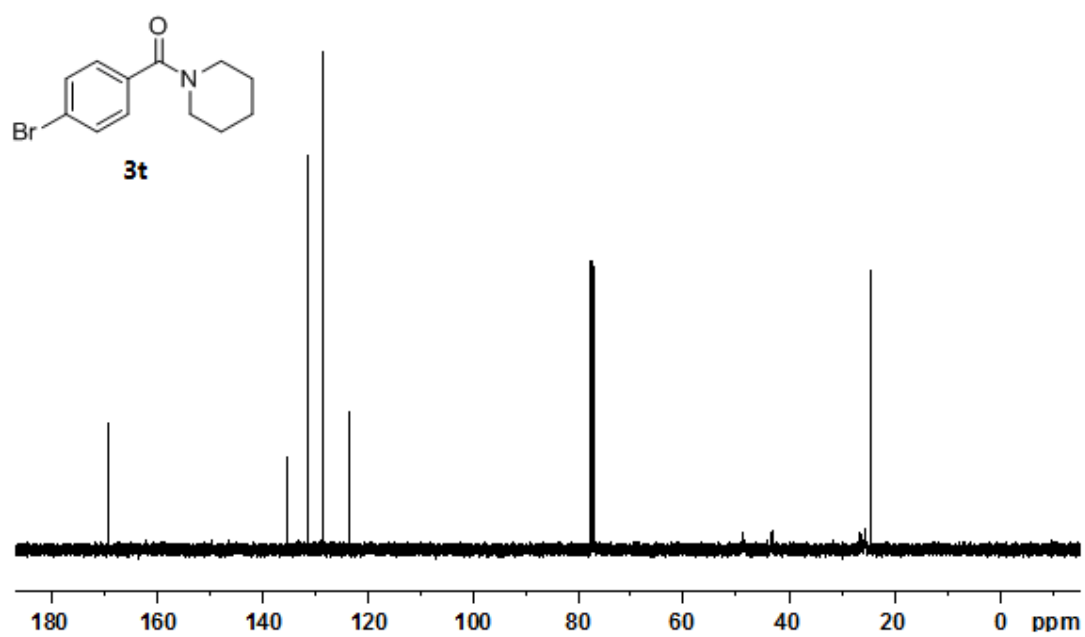

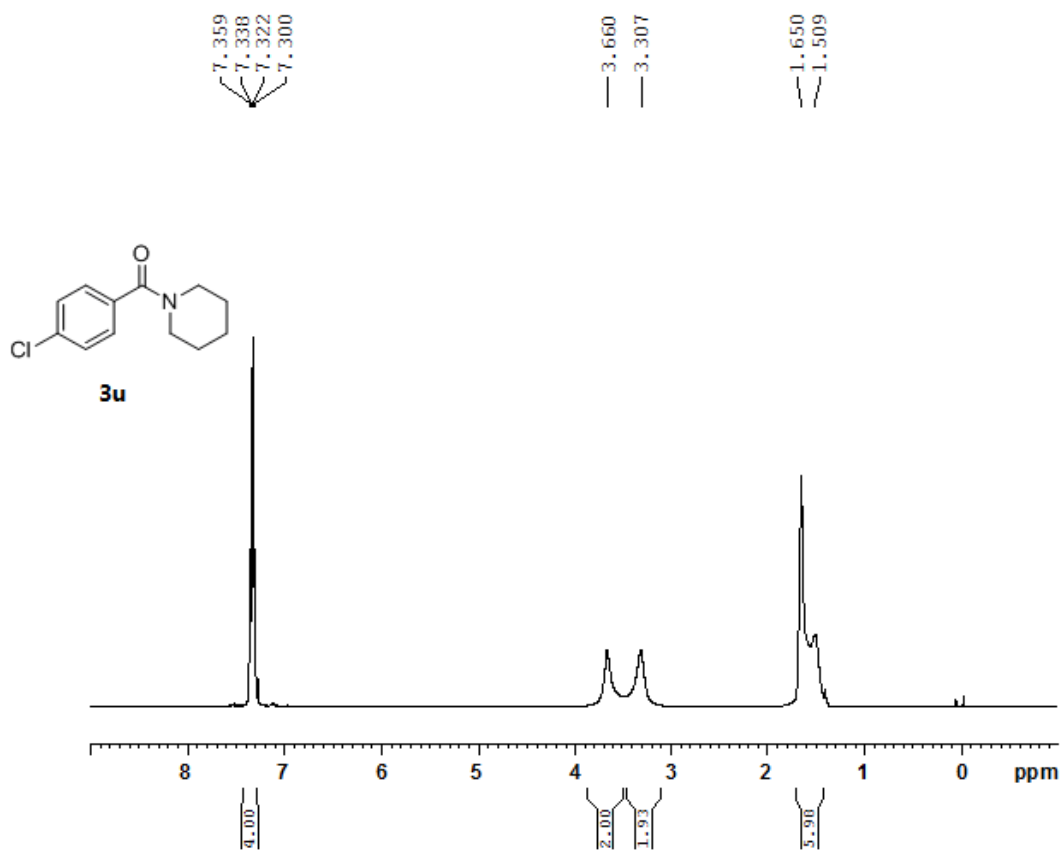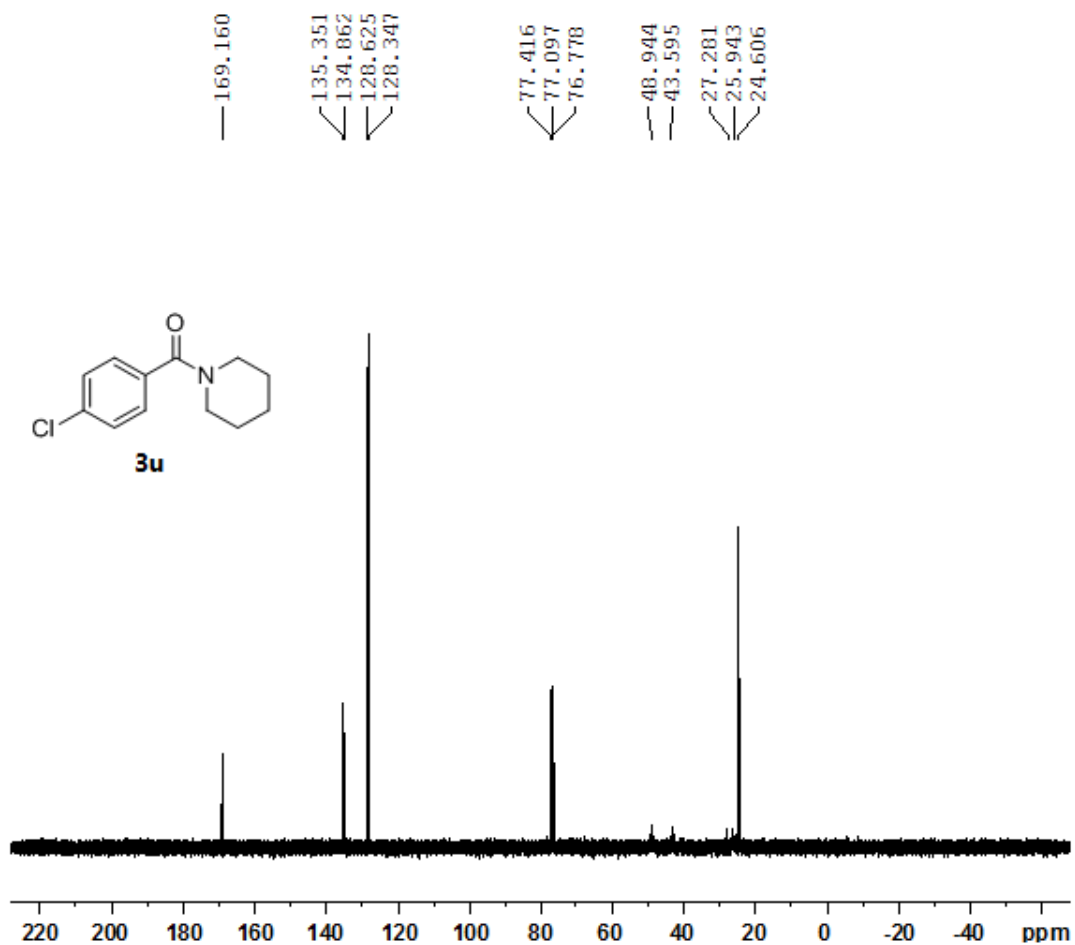

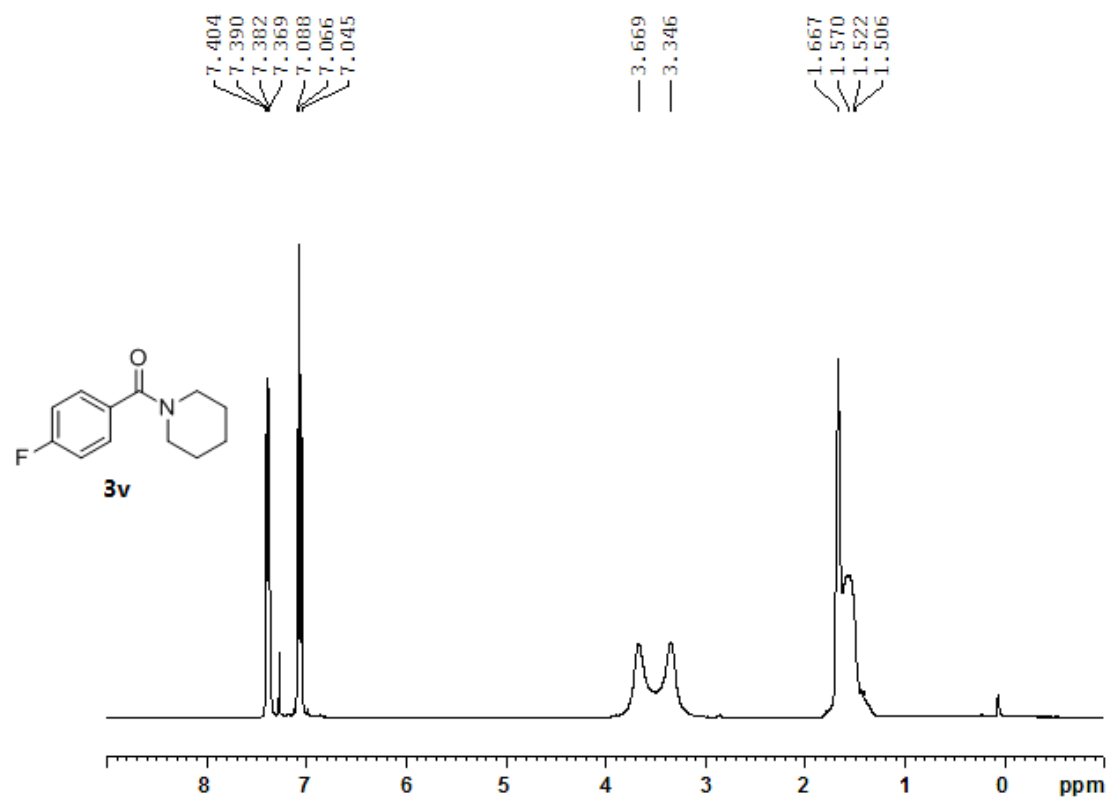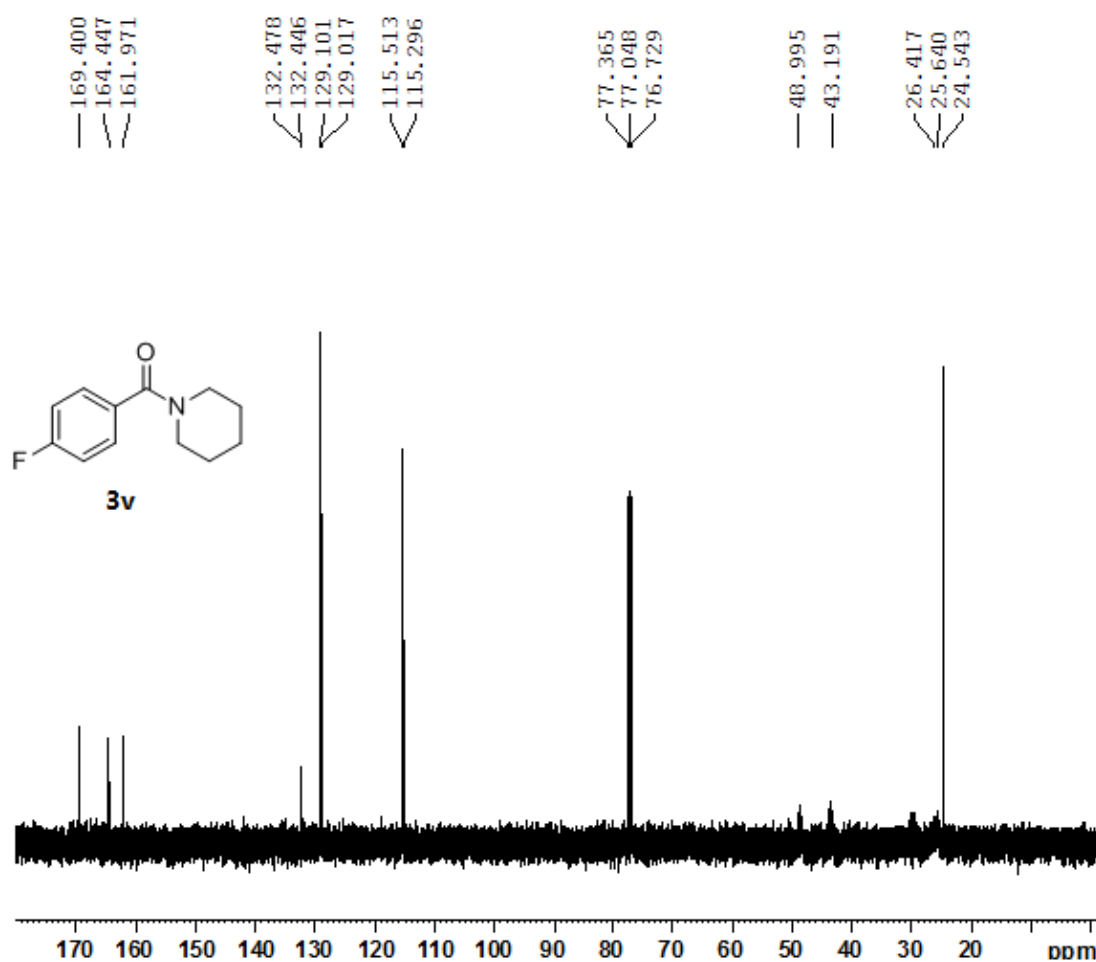



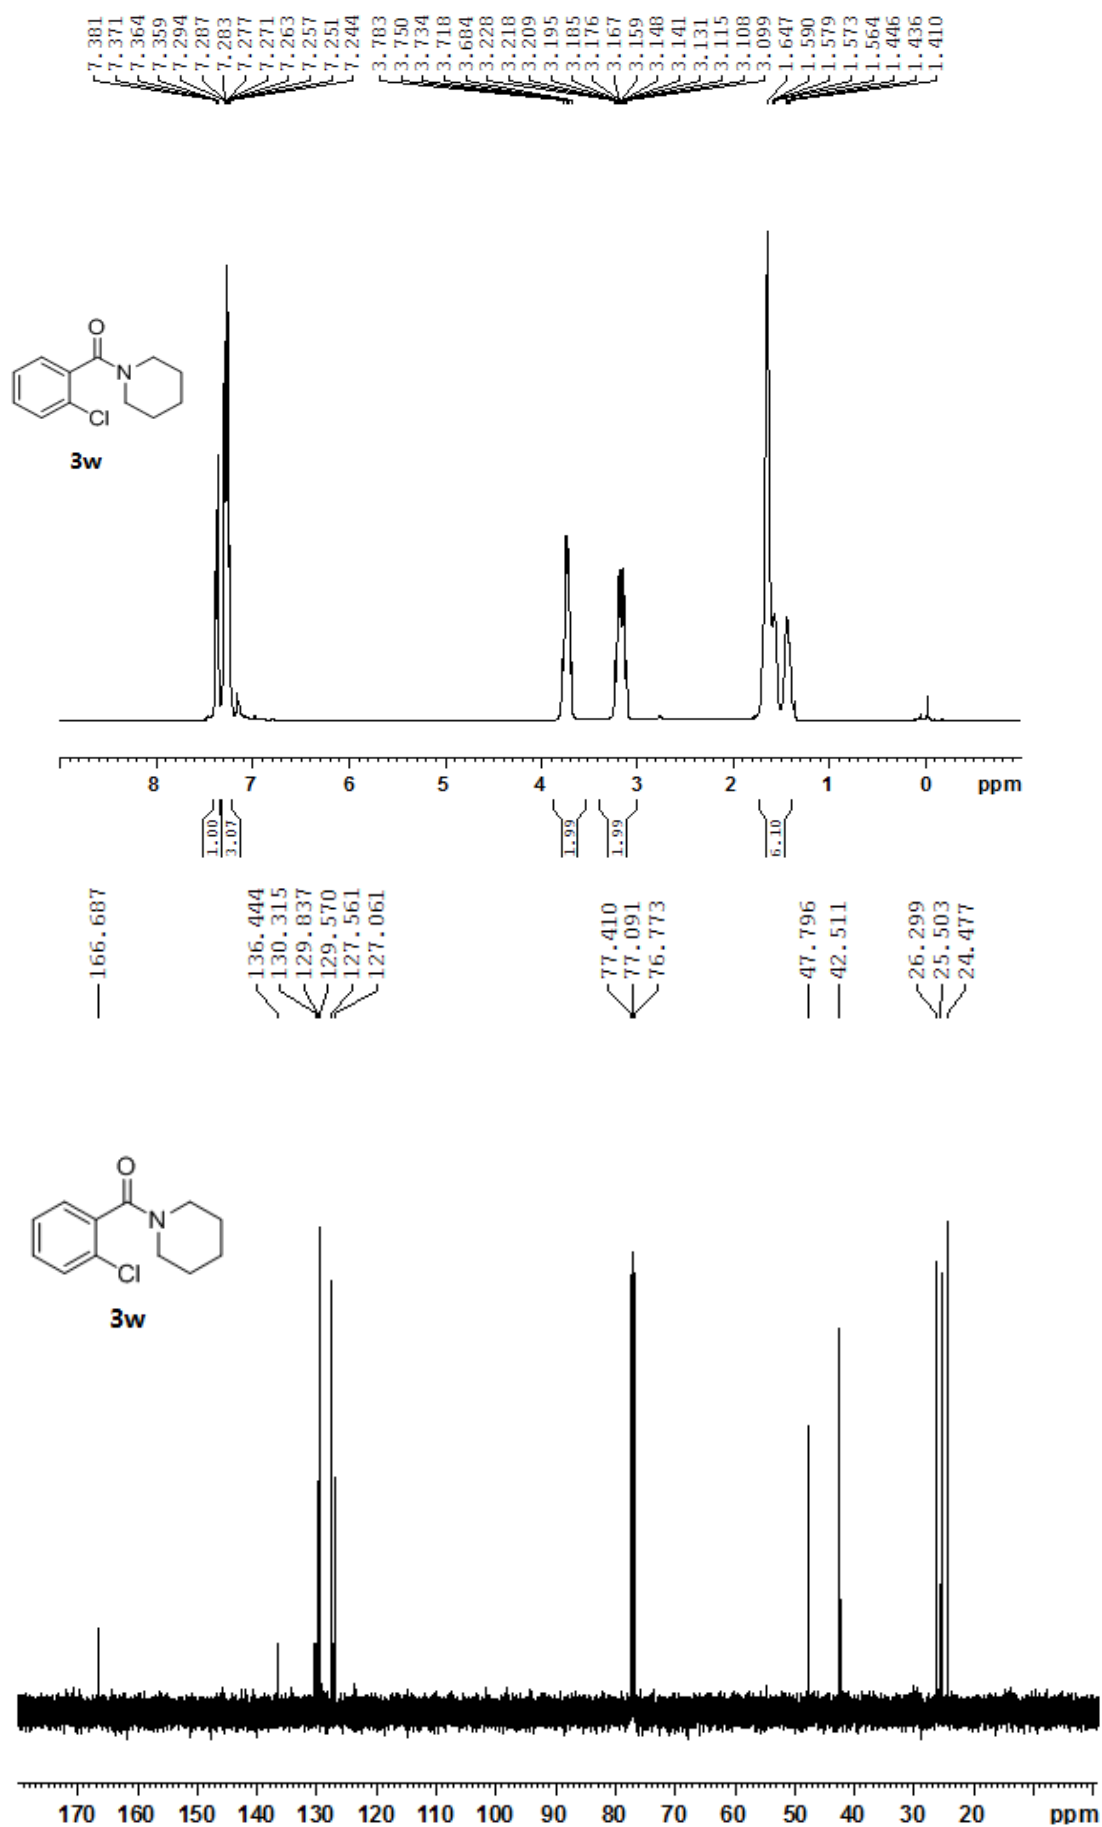

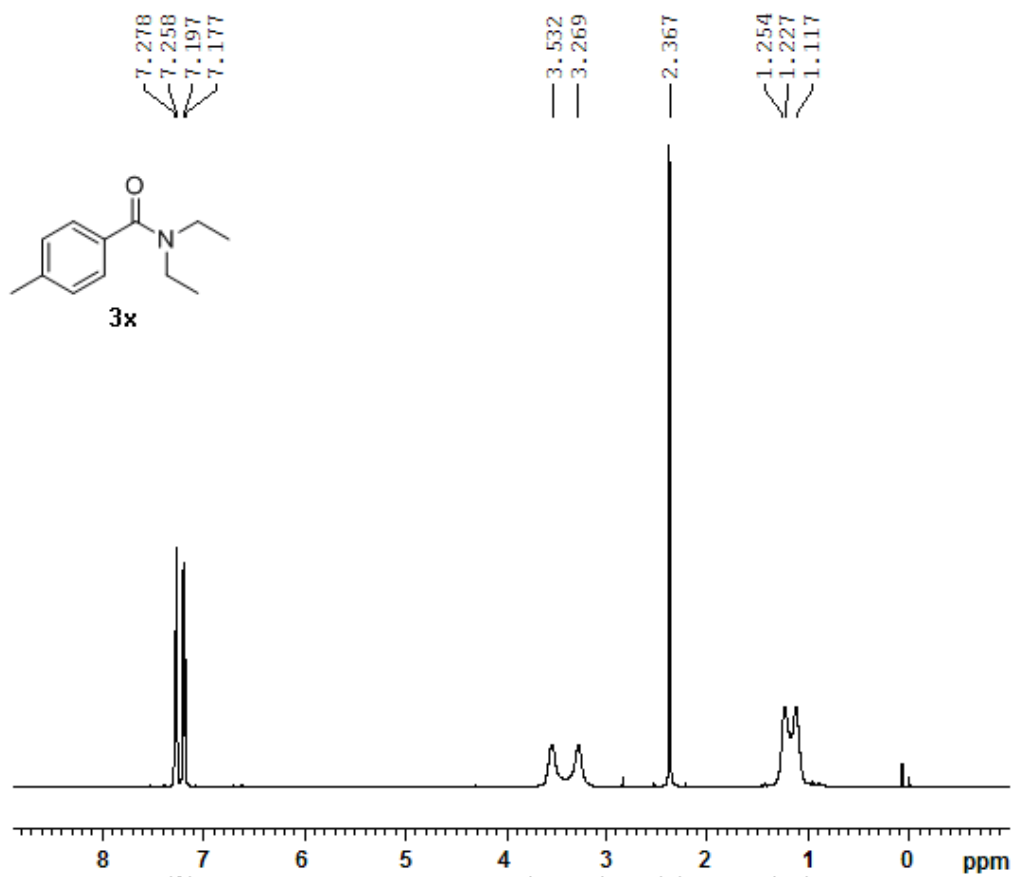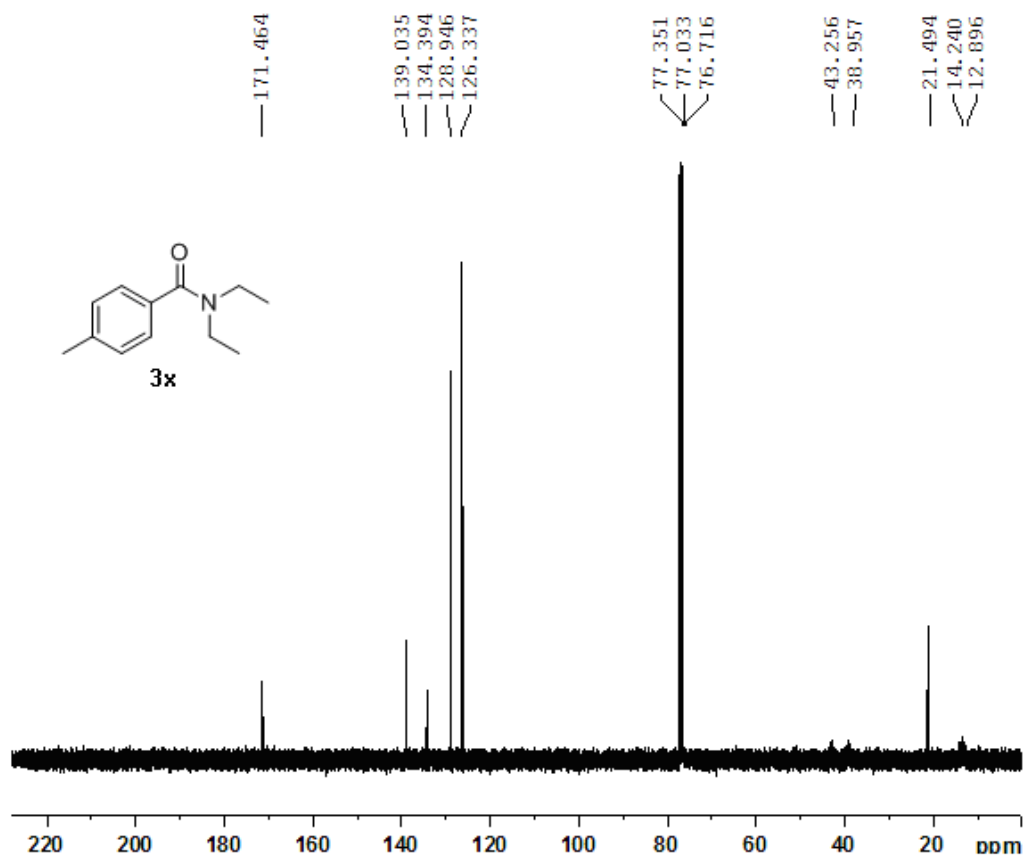

Supplement: c3ob41392f_2.pdf [file c3ob41392f_2.pdf]
